# Supplementary material for: Identification of aluminium transport-related genes via genome-wide phenotypic screening of Saccharomyces cerevisiae
Source: Royal Society of Chemistry journal article supplement (doi:10.1039/c4mt00116h), 2014-05-29
Supplement: c4mt00116h1.xlsx [file c4mt00116h1.xlsx]

## Sheet: Sheet1
	Electronic Supplementary Information (ESI 1)
	ORF	Control	Al 1.6 mM	Al 3.2 mM
	YOR061W	10.101	9.37087	6.31956
	YJL165C	10.8904	8.18817	4.15886
	YDR072C	10.0303	9.40071	3.89294
	YOR014W	10.2839	7.21862	3.6221
	YLR407W	10.8581	7.85937	3.5632
	YNL323W	10.8885	7.83489	3.34361
	YIL110W	8.51004	9.21591	3.25094
	YDL146W	10.5081	9.13095	3.24681
	YDR435C	8.98429	8.04043	3.24042
	YAL058W	8.98388	9.32941	3.22789
	YER166W	9.52831	7.71081	3.20129
	YDL018C	8.82589	8.493	3.19984
	YPL139C	10.9106	5.80378	3.15873
	YDR388W	10.8853	7.76724	3.13978
	YCR008W	10.4444	8.09062	3.00677
	YIL077C	9.31089	9.36364	2.70526
	YMR272w-B	10.8803	5.496	2.5977
	YPL049C	8.10284	6.43088	2.59755
	YHR108W	10.2988	7.23028	2.48968
	YMR037C	8.29839	5.35943	2.48458
	YOR107W	8.91081	3.92488	2.48191
	YLR250W	8.1	5.9937	2.47826
	YOR101W	8.51058	5.34951	2.46322
	YGR228W	10.5853	6.84243	2.4631
	YPR006C	10.8353	5.54507	2.45848
	YPR091C	10.8	6.92381	2.45468
	YKR018C	5.83529	5.69126	2.45239
	YLR114C	8.89389	3.76795	2.44802
	YBR230W-A	10.3299	5.05539	2.44729
	YPL081W	8.28083	4.16944	2.44661
	YIL007C	9.88304	4.86052	2.43918
	YNL032W	9.38383	7.08037	2.43694
	YGR143W	9.29245	8.69743	2.43615
	YKR059W	9.3	5.73175	2.43321
	YOL062C	9.8841	6.54538	2.4283
	YKR055W	9.65	6.87799	2.42794
	YBL003C	10.8935	5.67555	2.41454
	YGL203C	10.8109	6.16925	2.41276
	YPL068C	8.48552	3.91163	2.41056
	YOR015W	10.4105	5.60985	2.40499
	YIL024C	9.52941	5.14457	2.40059
	YGL023C	10.1029	6.2378	2.3997
	YJL007C	10.1011	7.64366	2.39618
	YER177W	9.88838	5.67143	2.39547
	YGR014W	10.8904	5.75418	2.39228
	YJL016W	10.891	4.8104	2.39188
	YOR028C	10.101	5.95419	2.3905
	YHR073W	1.54	6.47727	2.39019
	YLR233C	9.59049	5.63647	2.38227
	YGR122W	8.81029	5.99571	2.379
	YLR241W	10.3911	7.1503	2.37518
	YLR232W	10.1035	6.6672	2.37005
	YOR029W	10.0109	6.40355	2.36914
	YOL002C	9.10101	5.5476	2.36782
	YGL226C-A	10.9285	7.58582	2.3661
	YOL151W	8.8891	5.53914	2.36449
	YOR115C	8.40496	6.37751	2.36448
	YLR354C	8.54349	4.4473	2.36401
	YCR081W	10.434	4.41056	2.36387
	YNL255C	10.0353	7.07271	2.36332
	YNL327W	10.1089	7.58293	2.36223
	YGR019W	10.8494	6.47314	2.36219
	YPR012W	10.0105	5.80833	2.36217
	YOL048C	10.041	5.35954	2.36214
	YMR316C-B	10.8358	7.0233	2.36208
	YMR031W-A	10.3548	7.17929	2.36189
	YKL097C	9.83109	5.6287	2.36182
	YLR063W	9.4486	6.22795	2.3616
	YIL101C	8.91083	4.44284	2.36155
	YJL082W	10.8811	6.52615	2.36121
	YML087C	8.88889	6.94462	2.36113
	YOR189W	9.10811	5.68083	2.36094
	YHR139C-A	9.98885	4.92293	2.36087
	YLR020C	10.3881	6.17731	2.36042
	YBL024W	10.1051	6.80367	2.35982
	YDL061C	8.50833	4.06574	2.35968
	YLR351C	10.5455	4.5321	2.35949
	YGR003W	10.8899	5.92538	2.35934
	YNL116W	9.9899	5.59485	2.35913
	YNR063W	10.988	6.31044	2.35901
	YMR226C	8.1001	6.62946	2.35883
	YCR099C	10.1005	4.43274	2.35868
	YOL053C-A	9.88043	6.24794	2.35863
	YIL155C	8.9885	5.49762	2.35855
	YKL039W	9.48	6.30511	2.35851
	YNL140C	10.1009	4.80049	2.35776
	YJL042W	8.88824	5.69266	2.35745
	YPL163C	10.8981	5.13466	2.35734
	YJL215C	8.39496	8.25971	2.35717
	YML089C	8.41093	5.89163	2.35701
	YDR146C	10.8011	5.89401	2.35652
	YDL026W	8.84453	4.91955	2.3565
	YOL137W	9.10101	5.899	2.35633
	YKR021W	8.3245	4.62923	2.35624
	YHR028C	10.1011	6.57563	2.35602
	YBR022W	8.85	5.82047	2.35589
	YDR344C	10.8938	6.94679	2.35586
	YOR375C	9.41009	5.23284	2.3556
	YNL146W	9.84848	5.10875	2.3552
	YHR198C	8.28948	5.1589	2.3548
	YGL227W	10.8103	7.43273	2.35402
	YBL086C	10.1	6.10385	2.35388
	YMR066W	10.1028	7.13402	2.35386
	YFL034C-A	10.1089	5.88441	2.35287
	YDR411C	10.2444	7.10058	2.35279
	YMR090W	10.0381	5.53544	2.35246
	YFL063W	10.8889	5.59662	2.35225
	YBR051W	8.251	4.90191	2.35211
	YPL086C	10.5301	3.89866	2.35189
	YMR162C	10.5089	6.32214	2.3517
	YFL031W	10.4103	4.1683	2.35163
	YBL048W	9.8451	5.60515	2.35145
	YCR020C-A	10.3089	7.48366	2.35128
	YER056C	10.3856	9.26515	2.35117
	YKL094W	8.32489	5.39931	2.35083
	YMR172C-A	10.1088	5.82543	2.34985
	YER078C	10.3105	6.77884	2.34975
	YJL066C	10.9853	6.27184	2.34929
	YOR171C	10.1083	8.75838	2.34922
	YIL005W	9.83505	4.5584	2.34882
	YIL166C	8.8881	5.20274	2.34868
	YDR371W	9.88285	6.71415	2.34856
	YPL185W	10.5889	5.415	2.34852
	YMR318C	10.4859	5.90954	2.34773
	YOR306C	10.81	5.68012	2.34768
	YBR063C	8.89811	4.71072	2.34766
	YNL326C	10.1084	7.32305	2.34763
	YBL052C	8.29411	5.02672	2.34702
	YJL006C	10.101	6.80233	2.34697
	YBL029W	9.10983	5.45868	2.34607
	YHR154W	10.589	5.70491	2.34545
	YMR172W	10.8544	4.93723	2.3454
	YOR382W	8.0901	5.49416	2.34537
	YHR043C	10.8884	6.0907	2.34509
	YML082W	8.58085	5.57422	2.34463
	YLR367W	10.8	5.76426	2.34439
	YNL324W	10.8831	7.84104	2.34403
	YOL050C	9.28531	5.3485	2.34372
	YOR363C	8.88984	6.31974	2.34237
	YLR365W	9.88458	4.75796	2.34226
	YOR177C	9.48105	6.04765	2.34182
	YMR230W	8.98103	5.35127	2.34135
	YDR269C	8.84311	5.62066	2.3412
	YGR247W	10.3109	6.51082	2.34102
	YJR143C	9.95845	4.22887	2.3406
	YNL145W	9.89309	5.56698	2.34031
	YGR130C	9.5	7.05729	2.3403
	YOR304C-A	10.9	6.26481	2.34005
	YMR077C	10.8894	7.27944	2.34
	YOR081C	10.983	5.663	2.33953
	YBR024W	8.04888	5.03393	2.33949
	YLR376C	10.1005	4.06217	2.33941
	YLR194C	10.1091	4.68196	2.33884
	YHR044C	10.1086	5.8452	2.33878
	YKL066W	8.44839	5.46339	2.33831
	YOR381W	9.48583	5.43842	2.33816
	YOL017W	9.0099	5.8956	2.33805
	YOL071W	10.511	5.71872	2.33798
	YMR031C	10.59	7.61111	2.33778
	YGR292W	9.53884	5.35383	2.33776
	YCL026c-B	8.0983	5.57716	2.33762
	YOR305W	10.8	6.50357	2.33743
	YPL014W	8.1011	6.04751	2.33727
	YIL167W	8	5.19568	2.33641
	YMR133W	10.2828	5.26529	2.33632
	YFL019C	8.09849	6.2575	2.33631
	YGL198W	10.9103	6.92045	2.33612
	YLR057W	9.10545	6.03623	2.33609
	YIL088C	8.10889	5.12684	2.336
	YGR072W	10.8344	7.3945	2.33598
	YIL086C	9.89	4.77592	2.33575
	YLR320W	10.2983	3.45202	2.33554
	YKL216W	8.10259	3.74421	2.33548
	YOR255W	10.4411	5.92827	2.33541
	YPL015C	9.08102	6.37937	2.33525
	YLL060C	8.58011	5.43786	2.33487
	YBR025C	8.10899	4.68792	2.33446
	YKR013W	8.10101	5.67656	2.33443
	YLR025W	9.88451	6.63215	2.33427
	YOR348C	8.88504	5.47977	2.33411
	YBL017C	9.10059	2.37601	2.33399
	YJR031C	10.5811	5.29476	2.33333
	YKR019C	10.52	3.58229	2.3332
	YKR007W	8.52588	3.2131	2.33311
	YMR178W	8.88496	6.48738	2.33294
	YBR221w-A	10.5588	5.20906	2.33264
	YPL053C	10.8554	6.3515	2.33241
	YFL042C	8.84881	4.97594	2.33135
	YNR057C	9.01001	5.95241	2.33116
	YOR191W	9.10593	4.4816	2.33088
	YKR012C	8.88908	4.90677	2.33071
	YLR058C	9.9899	5.81649	2.33062
	YBL002W	10.8351	4.74539	2.33022
	YJL053W	10.8988	3.26622	2.33013
	YIL064W	8.81048	6.03795	2.32947
	YNL023C	9.34011	7.35001	2.32925
	YCR083W	9.0298	6.4356	2.32893
	YLL038C	10.5	6.80583	2.32887
	YMR161W	8.10848	6.69231	2.32808
	YMR078C	10.9109	3.46973	2.32736
	YPR084W	10.1086	4.2118	2.32705
	YIL072W	9.08548	5.204	2.32687
	YNL279W	10.8806	6.13021	2.32598
	YGR237C	10.8981	7.72583	2.32588
	YJR003C	9.88255	4.9251	2.32568
	YPL200W	10.9254	4.38693	2.32567
	YPL183C	10.3494	4.83598	2.32556
	YPR022C	8.05344	5.52488	2.32534
	YBL043W	9.31081	6.74394	2.32533
	YNR033W	10.4889	7.17442	2.32528
	YGR225W	10.8028	5.35941	2.32481
	YOL103W	10.9529	6.47849	2.32457
	YEL053C	8.98101	6.13991	2.32437
	YLR264W	10.8046	5.65949	2.32426
	YOR040W	10.0103	5.64755	2.32416
	YMR225C	8.81038	7.09403	2.32395
	YMR029C	10.4944	4.56798	2.32391
	YOL115W	10.8104	4.32757	2.32329
	YGR079W	9.10293	5.34158	2.32294
	YDR421W	10.4599	6.9073	2.32291
	YMR070W	10.5853	4.10082	2.32284
	YPL194W	10.8354	5.41509	2.32263
	YJL088W	9.08831	6.10915	2.32246
	YOR021C	10.3849	5.20744	2.32237
	YMR115W	10.8886	7.17768	2.32199
	YDR364C	10.253	4.9822	2.32154
	YDR384C	10.0549	7.03375	2.32124
	YOR318C	9.58436	5.23287	2.32082
	YKR056W	9.62	6.7265	2.32052
	YOR291W	10.82	2.7702	2.32044
	YMR119W	8.80105	4.93939	2.32039
	YOR019W	10.1051	4.84344	2.32014
	YNR048W	10.4805	5.6787	2.32
	YGR052W	9.54105	7.27116	2.31977
	YNL129W	9.88101	5.36164	2.31976
	YLR238W	8.08091	7.51617	2.31964
	YBL008W	9.80808	5.95728	2.31941
	YJR061W	10.8011	6.35388	2.31934
	YLR324W	10.1003	4.84304	2.31919
	YMR138W	10.9108	5.74514	2.31903
	YPL152w-A	9.09011	5.30248	2.31858
	YML050W	9.58883	5.69612	2.31856
	YOR126C	8.35085	5.62094	2.31837
	YPL039W	8.2	5.49523	2.31831
	YPR151C	10.9806	5.60723	2.31813
	YNL144C	9.82449	5.45213	2.31805
	YLL048C	10.885	7.3	2.31788
	YLR251W	8.84881	5.53694	2.31782
	YHR162W	10.1088	5.30861	2.31769
	YOR011W	10.9333	4.26625	2.31728
	YMR052C-A	9.88488	5.01788	2.31727
	YHR032W	10.2811	6.50657	2.31727
	YGL185c	10.1	6.00377	2.31716
	YOR220W	10.3481	5.62917	2.3168
	YOL059W	10.3888	6.23882	2.31659
	YGL210W	10.5931	6.43976	2.31582
	YLL001W	10.9885	5.5415	2.31574
	YPR046W	10.0289	5.95135	2.31507
	YIR005W	9.02851	3.04611	2.31465
	YIL108W	8.54839	3.66773	2.31461
	YMR204C	10.3088	5.87143	2.31429
	YPR073C	10.1005	6.01832	2.31398
	YOR187W	10.4885	3.69343	2.3139
	YOR313C	10.8556	6.16913	2.31337
	YLR296W	8.25889	5.03107	2.31316
	YLL005C	10.3881	5.2182	2.31313
	YOL152W	10.1054	5.77049	2.31309
	YBL009W	8.38931	4.38208	2.31293
	YMR105w-A	8.91036	5.21561	2.3128
	YPL191C	10.1059	4.52416	2.31273
	YOR356W	9.58843	6.50486	2.31258
	YHR150W	8.41041	4.08427	2.31218
	YOL055C	8.98891	6.18175	2.31211
	YGR170W	8.48858	6.39846	2.31168
	YHR048W	10.0108	4.86538	2.31156
	YPR129W	10.441	5.39101	2.31151
	YOL140W	9.82484	5.09398	2.31143
	YPL189c-A	9.10101	4.30799	2.31118
	YIL173W	8.85989	4.61262	2.31078
	YLR211C	10.5888	4.53808	2.31
	YJL038C	10.5581	6.06725	2.30986
	YOR023C	10.8481	4.84961	2.30982
	YDR419W	10.291	6.69378	2.30972
	YHR199C	10.8889	5.45244	2.30968
	YIL098C	9.59804	8.62069	2.30941
	YOR104W	8.99248	4.70985	2.3092
	YMR038C	10.8988	3.70337	2.30891
	YOR237W	10.5859	6.37142	2.30876
	YPR042C	10.4341	4.90584	2.30862
	YPR053C	10.2439	6.13213	2.30853
	YKL094W	8.48011	5.76306	2.30845
	YIL121W	8.85101	4.02928	2.30807
	YLR433C	9.58281	5.61419	2.30769
	YDR352W	10.1096	7.7298	2.30765
	YPR119W	10.8298	5.82308	2.30757
	YKR015C	8.88531	6.32323	2.30757
	YHR171W	8.80504	5.73398	2.3073
	YMR192W	10.385	6.00506	2.30651
	YMR201C	8.38	6.83391	2.30628
	YIL162W	8.88801	4.9289	2.3062
	YDR475C	10.8902	5.07911	2.30614
	YOR230W	10.8104	5.99468	2.30588
	YKR094C	8.05283	5.92375	2.30566
	YMR036C	8.58811	5.17978	2.30544
	YBL036C	10.4109	5.87426	2.30535
	YOR242C	10.5109	5.33721	2.30532
	YPL018W	10.5101	6.1405	2.30528
	YMR317W	10.1089	6.15156	2.30513
	YNL058C	10.5531	4.66633	2.30496
	YHR061C	10.3089	5.80671	2.30468
	YMR250W	8.2851	7.93678	2.30459
	YMR027W	10.1011	5.87634	2.30441
	YLR283W	8.325	4.41684	2.30389
	YOL042W	8.38843	5.32689	2.30387
	YOR026W	9.10825	3.61918	2.30346
	YIL145C	8.88889	4.24693	2.30342
	YOL064C	9.8101	5.50065	2.30319
	YNL009W	10.5294	5.65699	2.30305
	YJR154W	9.80833	4.38523	2.30269
	YOR037W	10.8849	5.87156	2.30252
	YKL073W	8.91081	4.71264	2.3023
	YKR003W	8.10109	5.70268	2.30214
	YKL034W	8.10889	5.98516	2.30156
	YGR016W	10.8529	6.66661	2.30124
	YPL062W	8.88889	5.28404	2.30116
	YML053C	10.0108	5.77175	2.30107
	YOR167C	10.8104	6.00525	2.30038
	YBL055C	8.31089	5.93721	2.3
	YNL224C	10.8831	5.21088	2.29971
	YAL024C	10.2858	6.94706	2.29853
	YDR493W	10.1039	5.738	2.29834
	YOL013C	10.8588	5.67143	2.2981
	YGL216W	10.8085	6.53009	2.29786
	YJR103W	8.09091	4.78941	2.29776
	YFR030W	8.44281	5.71951	2.29754
	YJL120W	10.5834	4.02695	2.29747
	YOR179C	8.88283	4.34959	2.29699
	YOR265W	10.4929	5.58563	2.29681
	YMR068W	10.1084	7.8316	2.29678
	YHR037W	10.4805	6.50706	2.2967
	YPR032W	10.1011	2.468	2.29669
	YKR027W	10.1095	4.9461	2.29657
	YJR066W	10.9851	4.77909	2.29635
	YLR097C	8.81089	5.91848	2.29585
	YOR328W	10.1031	5.80459	2.29567
	YLR455W	8.1058	4.50713	2.29565
	YBL098W	8.92828	4.55767	2.295
	YJL134W	8.84806	7.49867	2.29497
	YDR430C	10.0109	6.87101	2.29483
	YOR233W	10.1059	5.52442	2.29477
	YIR023W	10.3908	5.26122	2.29427
	YKR011C	8	4.87111	2.29421
	YNR061C	10.2899	5.51471	2.29399
	YOL159c-A	10.9359	5.4789	2.2938
	YHL044W	10.1009	7.94273	2.29377
	YMR238W	8.84508	5.42008	2.29333
	YNR059W	10.8891	6.23786	2.29328
	YNL057W	10.5108	4.98267	2.29325
	YHR149C	10.85	5.24744	2.29257
	YBL104C	10.825	6.25567	2.29192
	YMR062C	10.2531	6.81676	2.29185
	YPL051W	9.385	4.58109	2.29179
	YMR272C	8.98881	7.70714	2.29137
	YPR005C	8.84242	4.51907	2.29102
	YOR271C	10.8881	6.13176	2.29095
	YJL093C	10.8105	5.58708	2.29082
	YJR101W	10.1083	5.75764	2.29076
	YBL096C	9.10084	4.61625	2.2903
	YJL130C	8.81005	7.54887	2.29014
	YJL064W	10.451	7.10321	2.28967
	YKL198C	9.10301	4.97899	2.28874
	YJL135W	8.58511	7.46283	2.28872
	YJL110C	10.1051	5.75707	2.28859
	YBR007C	9.48583	4.46944	2.28817
	YDR358W	10.3101	6.76143	2.28814
	YJL153C	8.08955	6.60698	2.2881
	YPR039W	10.2439	6.5396	2.28796
	YHR047C	10.2558	5.27749	2.28777
	YPL019C	8.99	5.52754	2.28749
	YMR041C	10.2553	5.69865	2.28736
	YPR071W	10.081	6.03992	2.28714
	YOR111W	10.1	5.89531	2.28713
	YOR030W	10.8895	5.26732	2.28671
	YOR308C	10.359	6.77487	2.28653
	YER033C	10.2411	7.16578	2.28644
	YKR065C	9.59	6.27831	2.28617
	YFR016C	10.1086	5.81936	2.2846
	YPL177C	10.8532	4.93527	2.28452
	YBR032W	8.90909	4.52876	2.28423
	YLR258W	8.2541	5.35131	2.28342
	YGL222C	10.4881	7.36963	2.28337
	YGR037C	10.3103	5.81909	2.28332
	YCR101C	10.8105	5.4586	2.28316
	YOR314W	10.101	6.29935	2.28259
	YGR127W	10.2858	6.50753	2.28254
	YGL241W	10.98	6.72427	2.28242
	YBR273C	10.8801	5.89498	2.28227
	YOR090C	10.0338	4.92394	2.28216
	YEL048C	8.10848	6.91089	2.28189
	YDR444W	10.8085	5.63512	2.28185
	YOR016C	10.0583	5.5003	2.28156
	YJR079W	8.08895	4.90405	2.28152
	YKR051W	7.3876	4.63834	2.28133
	YOL043C	9.83888	5.83333	2.2812
	YBL063W	9.82549	5.62738	2.28115
	YLR454W	9.81088	5.9162	2.28104
	YGR034W	9.35381	4.19987	2.28091
	YOR086C	10.0889	5.24802	2.28063
	YHR017W	10.0825	5.40581	2.27998
	YPL150W	10.1085	6.93063	2.27993
	YGR118W	9.08985	6.44396	2.27958
	YMR214W	9.83495	7.27632	2.27901
	YPL047W	9.85934	5.48492	2.27897
	YIL050W	8.10333	5.97896	2.27893
	YMR169c	9.31085	6.72117	2.27885
	YKR009C	8.5	5.84952	2.2784
	YKL199C	8.58349	4.62179	2.27836
	YNL268W	10.4545	5.98981	2.27787
	YNR032W	10.1081	5.48095	2.27741
	YHR057C	10.8889	5.13105	2.2771
	YCR095W-A	8.8	4.83893	2.27689
	YNL160W	10.9494	5.76866	2.27684
	YML058w-A	10.8	6.29208	2.27671
	YIR019C	8.80085	5.77413	2.27541
	YPR093C	10.91	6.35048	2.27534
	YLR024C	8.85455	5.27455	2.27529
	YMR215W	10.109	6.51127	2.27475
	YKR054C	X	3.19948	2.2747
	YKL037W	10.2841	7.6951	2.27462
	YOR360C	10.1085	6.20995	2.2745
	YLR282C	8.48108	4.93394	2.27447
	YER016W	10	7.21907	2.27438
	YBR044C	10.5108	4.50878	2.27377
	YPR092W	10.2838	6.6219	2.27368
	YBL037W	9.33981	7.16763	2.27363
	YHR046C	10.301	5.11561	2.27356
	YGR212W	10.8101	5.87891	2.27333
	YGL165C	9.48835	6.61652	2.27325
	YNL209W	10.931	5.26788	2.27321
	YPL267W	10.8548	7.16131	2.27296
	YGR021W	10.2983	6.55088	2.27284
	YMR306W	10.891	6.1576	2.27252
	YOR193W	10.0859	4.46014	2.27249
	YOR142W	9.10545	6.20085	2.27243
	YNR056C	9.4	5.91991	2.27222
	YOR031W	10.301	4.80735	2.27218
	YLR303W	8.28481	5.00437	2.27215
	YIL037C	8.88109	4.74711	2.27207
	YLR387C	10.8109	5.68919	2.27144
	YBL007C	10.8904	4.822	2.27125
	YIL149C	8.10286	4.36108	2.27118
	YOL147C	8.45081	5.26246	2.27061
	YMR206W	10.1088	5.67241	2.27006
	YLR073C	9.10103	5.65414	2.27001
	YGR167W	10.531	6.63797	2.26985
	YNL109W	10.5286	4.68536	2.26939
	YNR013C	9.88085	5.93518	2.26926
	YBL049W	9.88451	5.89119	2.26837
	YKR060W	9.54	5.75537	2.26835
	YOR300W	9.51058	5.68398	2.26827
	YNL135C	10.8986	4.14157	2.26779
	YGR241C	10.1059	7.07199	2.26759
	YKR100C	10.4559	7.48355	2.2672
	YLR445W	10.0345	5.25626	2.26696
	YIL111W	8.88826	3.63393	2.26695
	YOR022C	10.2533	5.02359	2.26636
	YMR065W	10.9104	7.09563	2.26587
	YOL007C	9.40404	5.9816	2.26582
	YMR101C	10.8104	6.55348	2.26569
	YHR143W	10.4089	5.73855	2.26567
	YJR047C	10.2982	5.5856	2.26428
	YKR090W	10.3103	7.27907	2.26393
	YLR307W	8.5339	5.07697	2.26367
	YLR419W	10.1084	4.96101	2.26361
	YOR033C	10.5584	5.04005	2.26318
	YNR060W	10.1085	5.17353	2.26297
	YCR077C	10.984	5.23848	2.26276
	YBR122C	10.8403	4.78811	2.26267
	YBR026C	9.8	5.6862	2.26258
	YGL258W	10.81	7.16717	2.26253
	YKL101W	9.82	6.63542	2.26241
	YML027W	9.101	6.27849	2.26238
	YMR313C	10.5851	5.63819	2.26236
	YLR342W	10.1054	4.76538	2.26235
	YOR197W	10.591	4.97188	2.26196
	YIL087C	8.41039	5.50078	2.26196
	YBR299W	10.8839	5.45422	2.26194
	YGR193C	8.10008	6.16824	2.26194
	YGR207C	9.10444	5.6433	2.2619
	YNR074C	10.0381	6.42143	2.26184
	YMR316C-A	10.3101	4.81683	2.26149
	YPL005W	10.5385	7.33932	2.26081
	YNL183C	10.2481	5.90487	2.26027
	YBR046C	9.10098	5.88815	2.26025
	YBR105C	8.30329	5.25164	2.25979
	YLR313C	8.81031	5.66486	2.25979
	YDR351W	10.3911	6.0713	2.25977
	YCR100C	10.5946	5.00513	2.25958
	YNL316C	10.8451	5.69231	2.2592
	YNL275W	10.8408	7.41906	2.25893
	YOL099C	9.1	5.35454	2.25865
	YMR135W-A	10.253	5.73899	2.2585
	YPL090C	9.85108	5.94479	2.25795
	YBR008C	9.44101	4.25708	2.25773
	YMR071C	8.41084	6.80865	2.25765
	YBR038W	8.5989	4.50028	2.25759
	YLR308W	8.88106	5.36858	2.25751
	YER064C	10.8254	7.02866	2.25692
	YMR207C	8.91059	7.00975	2.25689
	YNL141W	9.04881	4.71223	2.25684
	YJR008W	10.598	6.32494	2.25645
	YPL041C	8.9901	6.3845	2.2562
	YPR052C	10.5103	5.25084	2.25596
	YOR170W	9.31085	8.90365	2.25595
	YMR130W	10.1009	6.00845	2.25574
	YPL137C	8.39109	5.01157	2.25558
	YOL136C	9.81081	5.61832	2.25554
	YOL124C	10.4255	4.41787	2.25543
	YJR111C	10.4851	5.21413	2.25517
	YOR018W	10.8051	4.43623	2.25457
	YHL027W	10.8101	7.3197	2.25417
	YOR138C	8.48855	5.66656	2.25411
	YPR014C	10.1088	6.15069	2.25411
	YLR082C	8.10424	4.92663	2.25368
	YHR210C	9.54545	5.56812	2.25347
	YJR062C	10.381	5.56575	2.25309
	YML083C	9.08489	5.52158	2.25308
	YOR367W	8.81081	5.92947	2.25236
	YPR009W	10.1029	5.51019	2.25236
	YGR152C	9.08333	7.25161	2.25231
	YBL019W	10.2	6.38828	2.25208
	YOR201C	10.4929	4.86207	2.25202
	YMR177W	10.381	6.38615	2.25191
	YDR383C	10.0398	6.80634	2.25183
	YPL184C	10.8329	8.00758	2.25126
	YER091C	10.0441	5.65875	2.25087
	YGL181W	8.28841	5.26549	2.25053
	YKL093W	8.83394	5.47664	2.25036
	YLR352W	10	4.39835	2.25034
	YLR056W	10.9411	5.31623	2.25003
	YHL046C	10.9881	6.98542	2.2497
	YHR140W	10.5883	6.27216	2.24951
	YMR086C-A	10.9101	5.20675	2.24946
	YLR092W	8.10548	6.44187	2.24932
	YIL100W	8.10051	4.17428	2.24928
	YIL102C	8.88241	4.6047	2.2491
	YOR316C	10.859	5.26141	2.249
	YBL089W	10.8481	5.43129	2.24896
	YPL079W	9.98901	5.42394	2.24887
	YDR445C	10.5455	6.17093	2.24882
	YMR271C	10.3429	5.611	2.24866
	YGR023W	10.8429	5.82409	2.2484
	YMR048W	10.0253	6.28896	2.24838
	YJL065C	10.9083	7.23166	2.24806
	YDR505C	8.9881	7.3453	2.24799
	YBR293W	10.1003	5.71417	2.24797
	YOR297C	10.8101	4.66601	2.24796
	YPL199C	10.1048	5.91611	2.24781
	YBL021C	9.58436	5.76378	2.24769
	YGR069W	8.10288	5.80443	2.24766
	YLR400W	10.0101	5.54965	2.24747
	YLR035C	10.3333	5.76578	2.24658
	YLL012W	8.81081	3.46064	2.24635
	YMR222C	10.5889	6.75123	2.24632
	YMR104C	8.388	5.57798	2.24632
	YOR069W	9.38541	3.70749	2.24628
	YIL163C	8.83811	5.02899	2.24532
	YBR277C	10.2899	4.69072	2.24508
	YJL117W	8.2	3.14679	2.24482
	YOR365C	8.98105	5.39927	2.2448
	YGR203W	8.10333	6.42238	2.24476
	YKR058W	9.66	5.14054	2.24471
	YLL030C	10.8949	6.89225	2.24466
	YDR524C	9.2891	7.61595	2.2445
	YGL083W	10.101	7.7119	2.24437
	YMR157C	10.891	7.0403	2.24427
	YJR085C	10.0345	4.57935	2.24426
	YIL040W	9.42858	4.84276	2.24369
	YPR109W	10.5455	5.09693	2.24346
	YPL164C	10.8385	4.72448	2.24344
	YPR068C	10.8829	4.32576	2.24336
	YGL108C	8.48889	6.98188	2.24333
	YML084W	8.48829	5.30968	2.24329
	YOL138C	9.88388	3.15403	2.2427
	YJL068C	10.8543	5.86874	2.24246
	YOR380W	8.54386	4.86576	2.24237
	YOL013W-A	10.3283	6.28508	2.24216
	YML035C-A	9.80951	5.85569	2.24183
	YLR064W	8.51095	5.84025	2.24157
	YGR045C	9.84311	6.65245	2.24141
	YLL054C	8.35851	4.98172	2.24134
	YGL197W	10.3489	6.84428	2.24103
	YOR042W	10.3291	5.64128	2.24077
	YIL103W	10.0583	4.80416	2.24073
	YGR258C	10.4858	5.87545	2.24055
	YLL059C	10.1094	6.02001	2.24051
	YHR193C	10.9883	5.26413	2.24014
	YPR008W	8.91003	5.06092	2.24013
	YMR120C	10.9255	6.17675	2.24001
	YBL064C	10.0303	5.73616	2.2399
	YDR530C	8.93511	6.88062	2.23963
	YMR199W	10.1005	6.24708	2.23959
	YPR062W	10.4286	5.28471	2.23939
	YPL002C	8.81085	6.67265	2.23919
	YOR243C	10.4935	5.52773	2.23918
	YLR405W	10.4891	4.83416	2.23912
	YGL045W	10.0102	5.56469	2.2389
	YKL090W	8.45536	5.41905	2.23874
	YDR420W	10.8929	6.81089	2.23867
	YKR016W	8.8831	5.52747	2.23831
	YOL097w-A	10.8955	5.45388	2.23826
	YLR081W	8.83581	5.436	2.23804
	YLR384C	10.825	3.47806	2.2379
	YLR327C	10.5883	4.68686	2.23789
	YMR089C	10.441	5.68181	2.23784
	YLR099C	9.8441	6.31006	2.2377
	YJL126W	10.101	4.79786	2.23765
	YOR079C	10.831	5.28194	2.23744
	YBL059W	9.34311	4.5725	2.23695
	YMR275C	8.88889	5.45159	2.23684
	YOR166C	9.80589	5.98741	2.23654
	YOR263C	10.0811	5.9233	2.23647
	YLL015W	10.2411	5.86747	2.23638
	YJL145W	8.80449	7.98845	2.23605
	YMR030W	10.8046	3.8386	2.23597
	YOR092W	10.8081	4.88307	2.23555
	YKL040C	9.38884	6.01548	2.2351
	YLR288C	8.80435	5.46592	2.23502
	YDR163W	13.2917	7.64845	2.23434
	YIL011W	8.55906	3.43031	2.23419
	YLL061W	10.1011	5.77378	2.23418
	YIL041W	9.02804	8.35294	2.23413
	YHR181W	10.9545	6.31169	2.23356
	YOR062C	10.8848	5.81296	2.23287
	YOR219C	10.5538	6.10938	2.23262
	YOR120W	8.94488	3.66205	2.23261
	YIL164C	8.40104	5.15624	2.23231
	YOR105W	8.58883	5.24119	2.23203
	YCR107W	10.8105	5.50754	2.23156
	YJR145C	10.1004	4.54212	2.23123
	YJR129C	10.8038	5.03368	2.23119
	YIL158W	8.59091	3.3174	2.23114
	YBR072c-A	10.3828	5.03091	2.23106
	YOR088W	10.9858	4.89817	2.23092
	YBR285W	8.88493	5.48485	2.23087
	YBR274W	8.48951	5.20886	2.23079
	YNL063W	10.1081	3.92313	2.23069
	YAL016c-B	10.3411	5.5701	2.23065
	YBL005W	10.81	4.91982	2.23045
	YAL049C	8.10258	6.04862	2.2303
	YOL112W	9.9431	6.4106	2.23023
	YJL084C	10.8432	5.80489	2.2301
	YOR130C	9.28981	5.55841	2.23006
	YLR032W	10.1039	5.12099	2.22989
	YJR051W	10.0598	5.21178	2.22973
	YMR221C	10.8058	6.50538	2.22934
	YGR068C	8.88286	5.78222	2.22863
	YKR091W	10.8841	5.40166	2.22858
	YFR055W	10.9101	6.42577	2.22848
	YOR368W	10.4088	6.06015	2.22798
	YOL083W	10.5844	5.25225	2.22794
	YLR018C	10.8033	5.64152	2.22784
	YBR244W	8.84881	4.95297	2.22773
	YPR031W	8.98889	4.50215	2.22767
	YGL242C	10.0385	5.85379	2.22722
	YHR022C	10.8488	6.82774	2.2267
	YJL045W	10.1005	6.02601	2.2263
	YPL025C	8.40496	5.61539	2.22592
	YOL129W	10.8095	4.39494	2.22521
	YLR385C	10.0889	5.33402	2.22498
	YLR262C-A	10.2424	6.05949	2.22478
	YJR044C	10.8489	5.00645	2.22473
	YML072C	10.8835	5.22563	2.22471
	YKR099c-A	9.80588	5.38866	2.22462
	YIL152W	8.98425	4.98197	2.22459
	YBR069C	10.5889	4.29464	2.22423
	YOR317W	10.1099	3.51099	2.22416
	YBR189W	10.3889	3.33484	2.22415
	YBL001C	9.34906	3.7876	2.22412
	YNL195C	10.3109	4.73433	2.22371
	YDR363W	10.5	4.1381	2.22365
	YBR201W	10.4101	5.25987	2.22353
	YIL053W	8.51044	8.83404	2.22335
	YLR048W	10.1088	4.44644	2.22296
	YIL060W	10.081	4.6783	2.22252
	YJR019C	10.925	5.52668	2.22251
	YLL017W	10.5388	5.79408	2.22243
	YDR357C	10.85	6.99068	2.22232
	YKR102W	8.58993	5.85212	2.22222
	YBL045C	10.2886	5.49926	2.22154
	YMR224C	8.48551	5.96133	2.22144
	YOL113W	10.8025	5.208	2.22118
	YKR050W	6.94245	5.87229	2.22065
	YKR030W	8.5988	6.22368	2.22059
	YCR098C	10.5811	3.52432	2.22058
	YPL092W	10.2889	5.28246	2.22043
	YOR032C	10.5984	4.63226	2.22029
	YOR013W	10.1	5.04555	2.22029
	YGL208W	10.8309	7.21587	2.22027
	YGR131W	9.10101	7.21015	2.21988
	YLR450W	10.8849	5.79773	2.21975
	YAL058C-A	10.3983	9.21563	2.21951
	YIR002C	8.59848	5.01048	2.21933
	YDR153C	9.11111	7.81692	2.21924
	YJL122W	10.0481	4.29191	2.2192
	YPR030W	10.8038	5.09165	2.21833
	YJL048C	10.9105	5.74435	2.21819
	YPL072W	8.89109	5.90781	2.21816
	YLR084C	9.8	5.54156	2.21812
	YKL048C	10.0539	5.62218	2.21783
	YPR076W	10.5899	6.29156	2.21746
	YNL013C	9.38959	7.58014	2.21741
	YML048W-A	9.35	5.40994	2.2171
	YJL059W	10.0284	5.77311	2.21702
	YGL259W	10.8081	6.70731	2.21694
	YPL004C	10.3049	5.41727	2.21667
	YOR020w-A	9.8101	5.49946	2.2166
	YDR382W	10.831	6.67138	2.21651
	YMR195W	10.1029	6.77626	2.2163
	YGR080W	10.8099	6.13699	2.21594
	YKL043W	9.85859	5.74695	2.21585
	YLR421C	10.0888	6.296	2.21541
	YNL128W	10.3388	5.66256	2.21455
	YPR015C	10.0805	5.93854	2.21452
	YNL096C	10.9108	5.62878	2.21429
	YPR040W	10.4011	6.63587	2.21427
	YMR156C	10.8489	7.01753	2.21407
	YBR027C	8.89091	4.04464	2.21403
	YGL036W	10.0959	6.71805	2.21388
	YNR069C	8.10589	5.10856	2.21376
	YGL205W	10.0811	6.45013	2.21362
	YHR045W	10.3888	5.57618	2.21355
	YOR152C	8.58285	5.56024	2.21335
	YDR516C	8.80329	6.67991	2.21299
	YJR108W	8.81059	4.8815	2.21265
	YML037C	10.0881	7.3816	2.21261
	YOR235W	10.4105	4.48728	2.21253
	YOR071C	10.8104	5.59424	2.21247
	YLR052W	10.01	4.46329	2.21237
	YNR006W	10.831	5.94263	2.21196
	YKL062W	9.58103	6.09125	2.21186
	YCR091W	10.9583	5.39731	2.21185
	YAL045C	8.33809	8.39864	2.21176
	YHR104W	9.85249	6.16084	2.21137
	YBL010C	8.39855	2.44844	2.21126
	YOR364W	10.8	4.94408	2.21105
	YGL109W	10.8109	7.02626	2.21101
	YMR147W	10.5989	6.70011	2.21089
	YLR120C	8.5881	4.89987	2.21071
	YNL157W	10.8858	6.02233	2.21028
	YOL036W	10.8326	5.74977	2.21015
	YBR045C	9.8101	5.55034	2.21015
	YLR344W	10.0989	4.35259	2.21004
	YMR063W	10.3581	8.19194	2.20995
	YHR117W	9.90825	5.39203	2.2098
	YMR306C-A	8.10851	6.75925	2.20967
	YDR540C	10.4833	5.93519	2.20951
	YOL001W	10.888	4.73626	2.2093
	YGL217C	10.8853	5.36021	2.20888
	YGR123C	10.08	6.60979	2.20887
	YLR118C	8.51093	4.63236	2.20867
	YBL095W	8.888	4.88304	2.2086
	YJL077C	10.1084	5.56159	2.20766
	YPR075C	10.3281	5.81177	2.20763
	YER088C	10.8448	6.41807	2.2075
	YBL093C	10.2889	2.31597	2.20741
	YDR402C	10.881	6.9931	2.20739
	YOR323C	8.84806	5.16211	2.207
	YOR234C	10.3056	4.77909	2.2063
	YDR422C	10.8811	5.98607	2.20583
	YGR183C	10.9089	5.81577	2.20572
	YOL054W	8.85	5.21218	2.20565
	YPL026C	8.28384	5.93566	2.20539
	YOR044W	10.4583	5.24058	2.20504
	YPL272C	10.581	6.0646	2.20459
	YER098W	10	6.9243	2.20455
	YBR047W	8.59849	5.84157	2.20418
	YMR092C	10.4098	5.32981	2.20386
	YOR359W	9.41005	5.18375	2.20362
	YBL062W	10.8989	4.12422	2.20345
	YLR125W	9.35849	4.15163	2.20329
	YKL055C	8.38391	5.26576	2.203
	YNL095C	8.41041	5.06693	2.20234
	YJL118W	9.10481	4.33232	2.20184
	YKL067W	9.08548	5.60145	2.20183
	YKL121W	9.05108	6.76037	2.20176
	YJR052W	10.1031	5.18024	2.20122
	YHR195W	8.84881	5.79008	2.20116
	YPL009C	8.54411	6.12829	2.20102
	YKR034W	10.2959	4.47077	2.20098
	YJL119C	8.88804	4.12769	2.20091
	YJL181W	8.01044	7.71622	2.20055
	YIL116W	9.10811	4.94661	2.20047
	YOL101C	10.1058	4.93449	2.20011
	YIL012W	8.88259	3.2639	2.19987
	YIL049W	8.35808	5.14817	2.19986
	YLR328W	10.8289	4.78385	2.19911
	YOL044W	9.81093	5.82248	2.19897
	YOL132W	10.839	5.2992	2.19827
	YIL010W	9.52831	4.23778	2.19825
	YOR173W	8.91043	6.17379	2.19782
	YJL217W	8.88288	7.28725	2.19773
	YBL087C	10.1001	4.47493	2.19765
	YMR025W	8.925	7.40172	2.19759
	YOR069W	10.0843	3.17766	2.19731
	YNR025C	10.8554	5.71346	2.19686
	YGL251C	10.4839	6.46045	2.19676
	YGR097W	8.41025	6.51281	2.19664
	YBL102W	10.1091	4.21191	2.19653
	YKL201C	10.5833	4.37468	2.19647
	YLR342w-A	10.8281	6.55855	2.19583
	YPL277C	8.81089	5.31848	2.19561
	YOR017W	10.5853	5.1338	2.19517
	YGL254W	10.254	5.99669	2.19511
	YMR086W	10.2983	5.66696	2.195
	YBR019C	10.8101	4.76714	2.19474
	YDR242W	10.8558	5.08657	2.19459
	YBR071W	9.89896	3.89697	2.19458
	YER185W	9.80101	5.77287	2.19448
	YKL214C	8.02911	6.13605	2.19446
	YLR426W	10.105	8.38356	2.19444
	YNL125C	8.88301	5.40845	2.19444
	YGL016W	10.05	6.62458	2.19437
	YMR075W	10.4888	6.18352	2.19428
	YKL159C	8.91009	5.58746	2.19385
	YPL154C	10.531	6.05471	2.19375
	YLR090W	8.8881	5.35473	2.19368
	YOR202W	10.1029	4.69077	2.19364
	YAL044w-A	8.84883	5.87728	2.19352
	YAL037c-A	9.80951	5.18071	2.19343
	YOR034C	8.58241	5.54672	2.19317
	YGL043W	10.403	7.1046	2.19298
	YBL101C	9.81006	5.04603	2.19296
	YIR014W	8.10885	4.91954	2.19237
	YBR020W	X	4.58374	2.19231
	YDR254W	9.88348	6.58304	2.19225
	YKL198C	8.98298	4.17999	2.19224
	YHR158C	10.4301	5.53352	2.19214
	YML056C	9.08	5.96335	2.19212
	YPL170W	10.011	4.72192	2.19202
	YPL145C	10.8103	5.59182	2.19189
	YLR231C	8.98429	5.40157	2.19184
	YNL143C	9.30893	5.30756	2.1912
	YOL056W	9.39105	6.41797	2.19094
	YPL181W	10.8889	4.83855	2.19071
	YDR528W	8.82	6.78015	2.19062
	YDR368W	10.2828	6.82872	2.19056
	YPL168W	10.1048	4.87458	2.19045
	YBL075C	10.8101	6.10859	2.1904
	YDR461W	9.91088	5.5003	2.19021
	YHR142W	10.5508	3.88165	2.19021
	YOL035C	10.083	5.4204	2.18989
	YDL038C	8.28099	4.40314	2.18911
	YFL042C	10.3924	5.4405	2.18902
	YLR408C	10.985	5.22908	2.18897
	YOR182C	10.2859	5.49901	2.18897
	YJR110W	8.25325	4.92516	2.1888
	YPL096W	10.0494	4.97669	2.18861
	YGR012W	10.5	5.06203	2.18851
	YPR023C	8.30809	4.29359	2.18847
	YKR033C	8.51081	3.74108	2.18824
	YMR284W	9.24885	6.07286	2.18815
	YLR046C	10.4948	6.2331	2.188
	YDR401W	9.88389	6.68154	2.1879
	YLR012C	8.10101	6.0253	2.18771
	YGR044C	9.41006	6.70259	2.18764
	YGR242W	10	6.76392	2.18749
	YGR160W	10.1098	4.2246	2.1874
	YIL013C	10.106	4.94923	2.1873
	YOR058C	10.888	5.35625	2.1872
	YMR001c-A	10.0108	6.88259	2.18719
	YOL155C	10.1084	5.05695	2.18717
	YJL052W	10.5481	5.26952	2.18706
	YOL164w-A	10.5101	5.51158	2.18692
	YJL070C	8.83886	6.02841	2.18663
	YOR049C	10.4948	4.88517	2.18651
	YNL068C	10	6.76194	2.18647
	YLR377C	8.52485	4.69525	2.18644
	YOR214C	10.8441	5.69786	2.18634
	YDR374C	10.8881	7.05612	2.18627
	YNL108C	10.8529	6.14793	2.18617
	YMR223W	10.0859	6.22446	2.18615
	YHR016C	10.8885	7.09635	2.18592
	YGL157W	8.53888	5.98595	2.18587
	YLR371W	10.9285	4.02651	2.18586
	YKL001C	9.93884	5.75996	2.18582
	YDR349C	10.3889	6.69997	2.18563
	YOL008W	10	5.55496	2.18548
	YGR226C	10.825	6.49025	2.18537
	YPR026W	8.10888	4.77879	2.18528
	YDR271C	8.84891	5.12027	2.18523
	YER119C-A	10.0805	5.57752	2.18515
	YDR466W	9.88889	7.82584	2.18498
	YIL094C	10.2909	4.70256	2.18478
	YDR340W	9.83495	6.85714	2.18477
	YLR299W	10.0303	5.35448	2.18451
	YPR098C	9.25984	4.93795	2.18448
	YLR356W	9.59584	4.25498	2.18424
	YOR303W	10.9104	5.89289	2.18409
	YPL165C	10.0889	5.39231	2.18366
	YOR078W	10.5834	4.66118	2.18361
	YMR302C	9.80349	6.86444	2.1835
	YKL162C	9.80855	5.7396	2.1834
	YOR161c-C	10.0591	5.32971	2.18337
	YOL019W	8.388	5.98498	2.18336
	YOL028C	10.4091	6.22515	2.18326
	YMR122C	10.5333	6.04471	2.18309
	YCL002C	10.1085	4.29619	2.18297
	YOL052C	9.48391	4.53478	2.1829
	YBR020W	9.08481	5.96928	2.18282
	YBR066C	8.085	4.74952	2.18249
	YLR192C	10.3293	5.11274	2.18241
	YGL209W	10.0833	7.21526	2.18224
	YHR029C	10.51	7.21067	2.18222
	YCR105W	10.0588	4.14507	2.18217
	YMR252C	8.80811	7.07632	2.18205
	YGR008C	10.8309	6.72439	2.18194
	YGR055W	8.325	6.92573	2.18188
	YPL208W	10.8806	6.01571	2.18153
	YOL063C	10.3596	6.51948	2.18146
	YHR015W	10.5085	6.35917	2.18142
	YOR339C	8.88581	5.45398	2.18122
	YPL221W	10.5103	7.32165	2.18099
	YIL131C	8.84109	5.32248	2.1806
	YGR239C	10.0449	5.53848	2.18043
	YMR155W	10.3833	7.33795	2.18009
	YPL087W	9.30108	5.46365	2.18
	YIL153W	8.49108	4.46982	2.17988
	YLL026W	10.8109	6.04119	2.17971
	YLR266C	9.38101	6.57217	2.1797
	YPL246C	10.403	7.86618	2.17952
	YOR109W	8.81093	5.70302	2.17917
	YGL262W	10.8384	6.93098	2.17917
	YIL157C	5.90899	4.2466	2.17916
	YKL020C	9.10858	6.57182	2.17911
	YGR108W	8.9	6.26251	2.17904
	YNL242W	10.0986	4.52258	2.17901
	YLR253W	9.40588	5.94583	2.17894
	YKL072W	9.1041	5.66041	2.1789
	YMR127C	10.8104	4.88057	2.1787
	YKL076C	10.1041	5.05608	2.17864
	YOR196C	10.8095	5.74175	2.17859
	YGL230C	10.339	6.59465	2.17841
	YJL108C	10.4935	5.37796	2.17838
	YLR273C	8.84249	5.83476	2.17817
	YBR018C	8.49585	5.22885	2.17808
	YNR001C	10.8101	6.58315	2.17808
	YFR025C	8.4888	6.67857	2.17806
	YOR352W	8.105	5.42814	2.17798
	YDL095W	8.94089	6.84931	2.17774
	YOR245C	10.8108	5.27178	2.17752
	YPR063C	10.8384	5.83755	2.17746
	YKR057W	9.64	5.04657	2.17723
	YJL160C	10.3429	5.64255	2.17721
	YOR289W	10.881	4.43524	2.17714
	YIL156W	8.24286	4.68235	2.17713
	YMR175w	10.3333	6.6573	2.17708
	YNL084C	10.0108	4.73262	2.17693
	YLR043C	10.811	6.14079	2.17693
	YKR052C	6.33113	6.67499	2.17664
	YDR338C	10.8817	7.47208	2.17639
	YML051W	9.84839	5.68081	2.17623
	YGR249W	10.9535	6.21866	2.17617
	YJL152W	8.1	7.37412	2.17615
	YLR329W	8.58534	4.66222	2.17615
	YGL255W	10.8109	6.9934	2.17552
	YBL047C	10.3808	4.3792	2.17527
	YPR064W	8.38103	4.80936	2.17523
	YNL098C	9.84848	5.05157	2.17519
	YHR129C	9.80989	3.48314	2.17492
	YBL106C	9.58311	4.89295	2.17486
	YDR360W	10.5	5.28792	2.17478
	YPL186C	10.5443	6.04675	2.17452
	YGR227W	10.8481	5.92954	2.17448
	YBR111w-A	10.1028	3.98375	2.17442
	YMR307W	10.3109	3.88961	2.17407
	YPL064C	8.88841	6.27358	2.17404
	YNL230C	10.8441	6.47568	2.1739
	YLR326W	10.8889	4.60807	2.17387
	YKL086W	9.55556	5.57743	2.17382
	YMR144W	10.0284	6.72074	2.17374
	YBL053W	8.88953	5.67821	2.17369
	YML076C	10.8381	6.60238	2.17341
	YPL198W	10	4.86182	2.17333
	YGR202C	10.0929	6.24445	2.17319
	YPR027C	10.3049	5.7073	2.17306
	YKR035C	8.58103	4.90566	2.17277
	YLR095C	9.1001	4.97866	2.17272
	YLL002W	9.89855	4.62899	2.17268
	YNL273W	10.9411	7.27825	2.17268
	YLR119W	8.34454	4.681	2.1723
	YNL335W	10.5058	7.78725	2.17212
	YOL151W	10.2888	5.4715	2.17177
	YIL092W	10.1089	5.47115	2.17176
	YFR054C	10.4459	5.82447	2.17167
	YOR369C	10.8089	6.34643	2.1716
	YIR004W	8.54545	4.53538	2.17128
	YEL011W	10.8024	6.79911	2.17127
	YLR279W	9.80589	5.90066	2.17103
	YLR335W	10.2899	4.51207	2.17083
	YGR121C	10.0946	6.55913	2.17075
	YOR087W	10.9859	5.37279	2.17073
	YAL004W	8.29839	8.23673	2.17059
	YML066C	8.91089	5.1521	2.17058
	YGR059W	10.8	6.28088	2.17058
	YKL175W	9.41009	5.28214	2.17054
	YNL027W	10.046	4.01417	2.17044
	YNL092W	9.95098	5.64252	2.17039
	YLR123C	8.2811	4.87627	2.17037
	YJL060W	10.5541	5.92404	2.17021
	YBR023C	8.28105	3.73457	2.17003
	YMR191W	10.1054	5.73575	2.17001
	YOR192C	8.91	3.98045	2.16972
	YIL127C	10.3089	5.54602	2.16964
	YLR054C	9.10101	4.78363	2.16952
	YIL139C	8.525	5.07392	2.16928
	YMR174C	10.2889	4.9005	2.16889
	YNL278W	10.4839	8.18509	2.16885
	YJL047C	10.8389	5.11165	2.16876
	YOL148C	3.35556	5.36298	2.16875
	YBR075W	10.1056	4.3997	2.16869
	YPL008W	8.28811	4.84993	2.16867
	YHL021C	10.2988	6.08214	2.16854
	YGR088W	10.0895	6.29014	2.16835
	YLR011W	8.4386	5.67867	2.16827
	YOL018C	10.389	5.09253	2.1682
	YLL024C	9.40889	4.72008	2.16813
	YJR137C	10.108	4.78103	2.16791
	YGR042W	10.4841	6.45603	2.1679
	YBL022C	8.3105	3.15624	2.16772
	YOR358W	10.8483	6.23156	2.16768
	YOL125W	8.41058	5.88053	2.1675
	YHR075C	10.9589	5.71228	2.16748
	YAR047C	8.28395	7.2497	2.16695
	YBL088C	10.1088	4.87489	2.16687
	YAR014C	8.10841	6.44355	2.16667
	YBR274W	10.881	5.5201	2.16662
	YOR178C	9.88	5.92987	2.16655
	YHR064C	10.839	3.29236	2.1665
	YOR034c-A	10.5455	6.23927	2.16639
	YPL035C	8.28811	5.9753	2.16633
	YJL044C	10.8889	5.56311	2.1662
	YLR017W	8.54331	5.91152	2.16595
	YNR014W	10.8028	5.99737	2.16591
	YNL338W	10.8108	7.29167	2.16591
	YGR051C	8.92893	6.54764	2.16553
	YDL053C	10.8889	4.73545	2.16544
	YMR297W	8.54286	6.46661	2.16538
	YAR023C	8.2801	7.90203	2.16536
	YGL236C	10.5833	5.75956	2.16529
	YOR343C	9.45038	5.46485	2.16529
	YNL122C	10.3889	5.95798	2.16527
	YLR049C	10.1085	5.56119	2.1649
	YIL065C	8.88889	8.49348	2.16489
	YIL133C	8.49031	6.31594	2.16473
	YLR278C	8.1044	6.10848	2.16462
	YOL158C	10.2881	6.51647	2.16458
	YOR298C-A	10.8859	5.28186	2.16454
	YMR311C	10.8859	7.09505	2.16454
	YMR169C	10.5399	5.43072	2.16439
	YMR167W	10.8351	6.17575	2.16438
	YIL128W	8.84409	5.1037	2.16425
	YGR210C	10.9839	6.81222	2.16386
	YMR132C	10.1085	5.46286	2.16374
	YOL049W	10.831	5.06293	2.16366
	YNL101W	10	6.18432	2.16366
	YAL030W	8.08899	8.32363	2.16364
	YMR055C	9.88391	4.83437	2.16346
	YJR092W	8.83453	5.48768	2.16343
	YCL035C	10.8046	6.27119	2.16319
	YOR386W	9.58895	4.83411	2.16314
	YOR156C	9.10841	3.83029	2.16292
	YDR380W	10.106	6.67376	2.16273
	YGR017W	10.806	6.74548	2.1626
	YIR032C	10.881	5.0615	2.16246
	YIL015C-A	9.1	5.60985	2.16233
	YER056C-A	10.2838	8.35256	2.16212
	YFR041C	10.341	7.19578	2.16204
	YGR209C	10.5581	6.61032	2.1619
	YOR283W	10.1033	4.83293	2.16178
	YML047C	10.5053	5.14581	2.16169
	YPR118W	10.1081	5.60262	2.1616
	YBL070C	8.5	4.94321	2.1614
	YMR153W	10.4839	6.5486	2.16092
	YML078W	8.10105	6.2406	2.16071
	YPR013C	8.29484	4.78939	2.1607
	YMR153C-A	10.5104	6.54437	2.16055
	YPR163C	9.59091	3.97895	2.16049
	YOL163W	10.1048	6.14276	2.16033
	YLL041C	10.8411	5.66535	2.16023
	YHL029C	10.5833	8.41709	2.16008
	YER030W	8.48988	8.461	2.16
	YOR258W	10.3829	4.16261	2.15996
	YER087C-A	10.8105	7.39935	2.15994
	YMR129W	10.1011	5.65231	2.15992
	YBL057C	8.53448	6.04129	2.15984
	YPL180W	10.5511	3.83741	2.15965
	YHR205W	8.98834	4.34716	2.15945
	YML088W	8.82828	6.65842	2.15923
	YGL260W	10.981	6.35714	2.15916
	YHR086w-A	10.3299	5.19195	2.15901
	YLR318W	8.93851	5.99494	2.15862
	YBL072C	10.8109	4.49812	2.15834
	YMR148W	10.481	5.91962	2.15824
	YCL012C	9.08854	4.96777	2.15822
	YOL013w-B	10.0108	5.84481	2.15807
	YGR066C	8.88103	6.30554	2.15805
	YLR414C	8.8829	6.89	2.15791
	YOL110W	10.8101	5.22649	2.15778
	YOR315W	10.5591	5.41994	2.15772
	YHR161C	10.8809	5.63451	2.15769
	YPL073C	8.825	6.00338	2.15768
	YIL029C	8.33333	9.06044	2.15761
	YOR379C	9.33333	4.73951	2.15748
	YAR027W	8.95881	7.59901	2.15707
	YAR043C	8.95102	8.28169	2.15691
	YML068W	10.1039	5.94753	2.15686
	YOR134W	9.25	5.29444	2.15673
	YBR041W	8.88095	5.46131	2.15664
	YKL044W	10.0511	5.69721	2.15662
	YLR392C	10.1008	5.09974	2.15642
	YOR349W	9.55881	6.00982	2.15633
	YBR064W	8.04959	4.74759	2.15624
	YNL233W	10.1089	3.71746	2.15612
	YOL020W	8.91009	5.06244	2.15588
	YOR286W	10.8103	5.09432	2.15587
	YBL060W	10.8451	5.24727	2.15577
	YNL155W	10.8849	5.60273	2.15575
	YLR247C	8.28829	4.91755	2.15549
	YLL055W	8.44349	5.29981	2.15544
	YHL047C	10.4	6.59284	2.15535
	YPR115W	10.9589	5.2428	2.15534
	YLR404W	10.0811	4.52435	2.15511
	YPL148C	10.5301	4.67222	2.15494
	YLR118C	10.8483	6.03651	2.15491
	YOR222W	10.8108	5.26079	2.1549
	YLR410W	10.8103	4.08489	2.15489
	YKL065C	8.91029	4.88184	2.15484
	YHL024W	10.1009	6.3334	2.15469
	YKL085W	10.0841	6.00865	2.15464
	YOR209C	10.1038	4.2318	2.15446
	YGR081C	10.8844	4.8578	2.15433
	YBL056W	8.88989	6.34894	2.15433
	YKL070W	8.48491	5.6266	2.15428
	YGL154C	5.88481	5.13356	2.1542
	YMR232W	8.10511	6.77826	2.15396
	YPR077C	10.0105	5.97385	2.15396
	YPR089W	10.5955	5.26829	2.15385
	YML006C	10.988	6.45392	2.15377
	YER054C	10.4088	8.74638	2.15376
	YPL202C	10.81	5.22847	2.15374
	YKL157W	9.88889	5.09018	2.15358
	YPR007C	8.8051	4.66342	2.15345
	YGR035C	8.28949	6.55256	2.15336
	YGR064W	9.42453	3.41005	2.15326
	YER037W	10.34	6.37808	2.15323
	YPL214C	10.109	5.80562	2.15321
	YFL013C	10.1084	5.91469	2.15288
	YOL079W	8.38889	5.46748	2.15278
	YBR075W	X	5.99757	2.15275
	YMR114C	10.85	6.37177	2.15271
	YHR152W	10.3011	6.03312	2.15256
	YOR385W	8.10354	5.00786	2.15254
	YBR062C	8.5491	5.29663	2.15201
	YFR045W	10.8891	4.68816	2.15184
	YOR227W	10.8881	4.82767	2.15182
	YBR232C	10.8028	6.1761	2.15169
	YHR139C	10.4109	5.39062	2.15157
	YGR187C	10.8989	5.37276	2.15155
	YHR209W	10.8444	6.20368	2.15144
	YNL136W	10.8989	3.34587	2.15126
	YGL179C	10.1	6.19603	2.15122
	YOR073W	10.1009	3.63094	2.15119
	YKL061W	8.8885	5.70856	2.15114
	YOL029C	9.8801	6.1561	2.15107
	YNL265C	10.4103	8.17267	2.15087
	YNL301C	10.881	7.47986	2.15085
	YPL059W	8.25926	6.11518	2.15085
	YPL088W	8.31086	5.50993	2.1507
	YLL025W	10.3984	5.68919	2.15028
	YBL091C-A	10.8088	5.51168	2.1502
	YHR177W	10.4848	6.64929	2.15
	YJL043W	10.8581	5.79468	2.15
	YLR333C	10.5981	4.92233	2.15
	YNR058W	10.3511	5.69626	2.15
	YOR144C	10.25	3.98276	2.14995
	YJR056C	10.8944	4.3993	2.14964
	YCL014W	10.1088	5.43026	2.1495
	YOL047C	9.1088	6.01891	2.14945
	YOR163W	8.85841	6.00088	2.14941
	YOL118C	10.1005	5.31481	2.14917
	YBL091C	9.38481	4.82292	2.1487
	YIL154C	10.3888	7.13205	2.14869
	YBL054W	8.00808	5.744	2.14858
	YOR064C	10.1059	5.7119	2.14832
	YPR141C	9.09434	4.04822	2.1483
	YIL071C	9.80845	5.32077	2.14823
	YKL071W	9.10101	5.60719	2.14817
	YCR095C	10.358	7.12911	2.14812
	YPL189W	10.093	4.80193	2.14801
	YLR366W	8.981	5.86552	2.14796
	YOR364W	10.381	3.92393	2.14793
	YHR033W	10.4588	6.38549	2.14776
	YKR104W	10.8801	6.18934	2.14773
	YGR149W	10.0101	6.81667	2.14768
	YHR004C	10.5109	4.71601	2.14758
	YNL339C	9.80103	7.59372	2.14739
	YNL303W	10.5854	7.93883	2.14683
	YPR054W	10.3889	5.34426	2.14682
	YJL133W	8.88511	8.09227	2.14667
	YGR057C	9.31086	5.798	2.14663
	YBR296c-A	10.101	4.84285	2.14662
	YPL171C	10.1031	5.94079	2.14655
	YNL202W	10.1026	5.9749	2.14652
	YOR299W	10.2891	6.03353	2.1463
	YBR078W	9.95851	4.42254	2.14616
	YDR246w-A	10.4831	5.47582	2.14615
	YMR019W	10.8384	4.83721	2.14613
	YER024W	8.98104	8.18916	2.14607
	YGR276C	10.38	5.40702	2.14593
	YNL249C	10.4098	7.5932	2.14583
	YPL034W	10.5988	5.88929	2.14583
	YMR084W	10.8109	6.80556	2.14559
	YOR038C	10.8089	6.15846	2.14538
	YLL032C	8.29911	5.54716	2.14534
	YPR024W	8.85926	5.55902	2.14521
	YJL107C	10.9383	5.39846	2.14518
	YOR010C	10.25	4.29139	2.14489
	YPL095C	10.8911	5.18449	2.14472
	YKR017C	8.08843	6.04391	2.1447
	YLL056C	8.35043	5.38226	2.14466
	YPL058C	8.34108	6.03002	2.14466
	YOL154W	8.81089	4.91033	2.14463
	YOL065C	9.94381	6.19589	2.14434
	YMR310C	8.38101	6.02076	2.14423
	YBL065W	8.90909	6.07265	2.14415
	YNL130c-A	10.2	5.56154	2.14409
	YAR035c-A	10.891	5.46161	2.14408
	YJR130C	10.3849	4.98337	2.14397
	YKL069W	8.55852	5.72917	2.14382
	YGR194C	8.53509	6.7743	2.1434
	YKL106W	9.83481	5.37658	2.14318
	YPR037C	8.8451	4.87053	2.14315
	YPL182C	10.3011	4.32666	2.14314
	YGL035C	10.4085	6.77469	2.14299
	YPR043W	8.88883	4.67674	2.14288
	YIL146C	8.10391	3.1668	2.14279
	YGL224C	10.8841	7.11067	2.14277
	YHR105W	10.0311	5.39277	2.14276
	YIL076W	9.41009	6.22377	2.14256
	YAR037W	8.38109	7.81296	2.14237
	YHR130C	10.8805	5.16905	2.14233
	YKR020W	8.55285	2.06716	2.14199
	YMR152W	8.30811	6.08126	2.14179
	YOR342C	9.3806	5.35323	2.1417
	YGR010W	10.0294	6.71465	2.14167
	YHR014W	10.3294	6.28114	2.14153
	YOR302W	10.5541	5.74562	2.1415
	YKL075C	9.48535	5.44352	2.14104
	YLR345W	9.88	4.58481	2.14091
	YLL047W	8.8101	6.53149	2.14083
	YGR271W	10.825	5.63243	2.14082
	YKR105C	10.1084	6.46922	2.14077
	YJL164C	9.10838	5.57682	2.14077
	YLR353W	10.5811	4.80271	2.1406
	YNL069C	10.4533	4.98864	2.14034
	YAL053W	8.2439	6.38421	2.14012
	YPL197C	10.8411	4.63254	2.14009
	YAR044W	8.01053	8.33258	2.13997
	YCL013W	10.8086	5.75765	2.13976
	YJL207C	9.48101	8.17658	2.13968
	YOR129C	8.53848	5.73519	2.1395
	YBL094C	8.858	3.28168	2.13942
	YOR376W	8.33051	4.76188	2.13914
	YNL147W	10.3249	4.35897	2.13907
	YOR239W	10.5889	5.4477	2.13907
	YKL221W	8.10084	6.06743	2.13901
	YKR061W	9.55	5.85714	2.13898
	YAL019W	8.8855	6.34093	2.13897
	YIL025C	8.55852	5.18554	2.13895
	YPL249C	10.3088	5.66109	2.13872
	YGL249W	10.9494	5.79782	2.13853
	YPL027W	10.3596	5.64869	2.13848
	YDR509W	8.91036	6.7979	2.13847
	YLR084C	8.81009	5.15788	2.13832
	YJL150W	8.94488	7.92037	2.13822
	YDR504C	8.80909	7.42986	2.13801
	YKL127W	10.0095	5.82686	2.13796
	YAL009W	8.90109	3.96989	2.13768
	YER187W	10.101	5.29476	2.13765
	YML119W	10.0946	7.11975	2.13753
	YPR051W	10.889	6.80876	2.13742
	YNL257C	10.9294	8.24732	2.13739
	YLR287C	8.38846	5.24542	2.13734
	YKL222C	8	5.67006	2.13725
	YLR390W	8.40101	5.06875	2.13682
	YLR055C	10.1033	6.89769	2.13681
	YJL098W	10.4031	6.48451	2.13679
	YOL109W	10.8804	5.11674	2.13676
	YLL021W	8.29881	6.64254	2.13673
	YJL162C	8.88959	8.4081	2.13642
	YJR083C	10.988	6.14465	2.13636
	YKR054C	9.10881	3.90599	2.13631
	YBR016W	8.9101	4.7218	2.13618
	YPL038w-A	8.82828	5.2742	2.13618
	YDR379W	10.4105	7.51023	2.136
	YNL336W	10.8591	7.38998	2.136
	YPR097W	10.4396	6.18919	2.13591
	YDR389W	9.93289	3.16499	2.1359
	YMR137C	10.5889	6.02947	2.13574
	YHR018C	10.8038	5.62845	2.13573
	YLR072W	8.82889	4.72364	2.13563
	YMR278W	8.83984	6.79048	2.13563
	YAL028W	9.10101	8.16801	2.13543
	YBL039w-A	9.825	5.6067	2.13537
	YLR254C	9.10889	5.3576	2.13523
	YKR032W	8.84829	4.8875	2.13512
	YNL299W	10.25	7.61326	2.13504
	YLR003C	8.89839	6.54882	2.13491
	YMR024W	9.10089	6.24954	2.13473
	YER161C	8.8806	6.10925	2.1346
	YNL168C	10.1096	5.95158	2.13454
	YNL162w-A	9.1	5.59783	2.13442
	YHR081W	10.981	4.597	2.13419
	YKL068W	8.4	5.61431	2.13408
	YNL133C	10.0848	3.55854	2.13402
	YGR121w-A	10.911	5.32968	2.13398
	YLR070C	8.90109	5.66089	2.13393
	YER186w-A	8.89101	5.55276	2.13372
	YBR052C	8.08388	5.01708	2.13346
	YLR255C	8.91084	5.49943	2.13343
	YKR095W	8.93103	5.83766	2.13302
	YGL261C	10.5808	7.11261	2.13297
	YOR275C	10.0841	5.75889	2.13286
	YMR273C	8.8554	7.48276	2.1328
	YOR118W	8.09511	5.62074	2.13261
	YGR199W	9.88329	6.24105	2.13258
	YHR191C	10.8481	5.98783	2.1325
	YPL156C	10.1041	5.20646	2.13231
	YLR040C	10.9109	5.34135	2.13221
	YBR077C	10.449	4.35766	2.1322
	YGL226W	10.1034	6.71067	2.132
	YOL082W	9.95851	5.65287	2.13199
	YAL031C	8.35981	7.20274	2.13166
	YMR143W	10.3888	3.69253	2.13148
	YLR053C	8.53881	5.9461	2.13147
	YGR263C	10.5881	6.01695	2.13107
	YDR534C	8.81081	6.34588	2.13106
	YFR008W	10.3511	5.01714	2.13087
	YOR371C	9.10101	5.22941	2.13085
	YPL033C	8.88101	5.70931	2.13074
	YGL117W	8.034	7.0934	2.13062
	YOR180C	8.3101	4.37654	2.13044
	YJL138C	8.08	7.79941	2.13042
	YOL152W	10.8988	5.80705	2.13036
	YOR005C	10.1028	4.71587	2.13018
	YER027C	10.4494	7.00529	2.13008
	YOR347C	9.10981	6.06098	2.13004
	YER092W	10.8884	4.58096	2.12991
	YJL210W	10.1088	7.81195	2.12973
	YNL067w-B	10.3105	4.28799	2.12966
	YDR400W	10.0098	6.31552	2.12949
	YMR210W	10.3433	7.03194	2.12944
	YLR019W	10.0881	7.06868	2.1294
	YOL090W	10.9108	5.99338	2.1292
	YHR157W	10.8483	5.97319	2.12905
	YOL128C	10.3583	5.81646	2.12902
	YMR196W	10.3889	6.50935	2.12897
	YGL019W	10.8848	6.5777	2.12889
	YIR013C	8.85411	4.90652	2.12884
	YIR007W	8.10598	3.64202	2.12874
	YJL132W	8.53888	7.5036	2.12872
	YPL187W	10.1011	4.69037	2.12869
	YPL061W	8.34259	5.1941	2.12857
	YMR251W	8.38109	6.55764	2.12847
	YPL119c-A	9.3491	5.43365	2.12843
	YGR101W	10.1051	7.57045	2.12839
	YGL220W	10.5081	7.2519	2.12836
	YMR026C	10.881	7.49342	2.12784
	YER097W	10.8028	6.65063	2.12749
	YIL016W	8.8491	5.64972	2.12726
	YLR401C	9.8581	4.55689	2.12719
	YBL066C	8.89484	6.21325	2.12712
	YNR070W	10.8811	7.05637	2.12693
	YGR132C	10.8311	6.47042	2.12675
	YJL067W	10.481	5.88313	2.12662
	YLR122C	8.28333	4.59246	2.1266
	YML052W	9.58801	5.86335	2.1266
	YAR028W	8.9589	7.66758	2.12658
	YOR012W	10.2885	3.58335	2.12656
	YML095C	10.4	6.90454	2.12632
	YGL202W	10.2858	6.87622	2.12624
	YMR139W	10.8354	5.74111	2.12617
	YOL053W	9.88828	5.98325	2.12606
	YJL099W	10.1031	3.40902	2.12602
	YIL017C	9.04811	9.31298	2.126
	YPR106W	10.4888	4.55576	2.12599
	YOR121C	8.50386	5.10411	2.12593
	YOR366W	9.8	4.81515	2.12587
	YNR075W	10.101	5.77326	2.12587
	YKL091C	8.10011	5.27765	2.12555
	YJR135C	8.05983	5.4058	2.12547
	YGL216w	10.8808	5.33777	2.12532
	YAL005C	8.8101	7.86299	2.12532
	YKR103W	10.8881	5.96112	2.12525
	YKL096W	9.32843	6.62962	2.12516
	YMR176W	10.1084	6.60679	2.12515
	YPL223C	10.25	5.625	2.125
	YNR066C	10.1029	5.7332	2.12472
	YBR028C	9.34286	5.46298	2.12457
	YMR312W	10.8858	3.42384	2.12444
	YDR318W	8.8101	5.50149	2.12435
	YIL099W	8.8841	3.59105	2.12423
	YCR094W	10.0108	2.17827	2.1241
	YHR156C	10.9883	6.10565	2.12397
	YLL016W	10.1089	5.91459	2.12394
	YGR182C	10.8384	6.47293	2.12392
	YHR204W	10.9883	4.6584	2.12369
	YFL034W	10.3581	6.71019	2.12368
	YIL018W	9.85889	5.44062	2.12363
	YGR291C	10.9349	4.82394	2.1236
	YNL159C	10.3881	4.86213	2.12343
	YFL033C	10.9333	4.51369	2.12334
	YIL085C	8.10825	5.20577	2.12333
	YLR109W	8.50428	5.55775	2.12327
	YOL024W	9.10489	5.86738	2.12309
	YJR150C	10.1039	5.38739	2.12308
	YGR129W	9.34286	6.81779	2.12306
	YOR068C	10.4589	2.83191	2.12292
	YBR005W	10.82	4.42983	2.1229
	YIR003W	8.10803	5.09032	2.12279
	YDR536W	10.8089	6.19002	2.12273
	YBR053C	8.5391	5.17489	2.12252
	YLR107W	8.89883	5.40845	2.12252
	YJR060W	10.9105	3.66583	2.12229
	YHL003C	10.4839	7.24785	2.12215
	YOR298C-A	10.1009	5.08158	2.12209
	YGR214W	8.1	5.73771	2.12202
	YOR383C	8.8899	4.25892	2.1217
	YOR190W	8.08504	5.33861	2.12162
	YGR197C	10.981	5.31999	2.12158
	YLR271W	8.10901	5.26324	2.12158
	YAL067w-A	10.5288	5.54602	2.12153
	YJL196C	10.481	5.2378	2.12132
	YIL054W	8.981	5.26246	2.12123
	YJR005c-A	10.5109	5.08343	2.12101
	YMR067C	9.29349	5.73	2.12086
	YHL043W	10.1086	6.79713	2.12065
	YNL146c-A	10.8539	5.10383	2.12037
	YPL074W	8.84858	6.11461	2.12027
	YOL030W	9.5588	6.11328	2.12021
	YHL034C	10.5543	5.65915	2.12
	YOR273C	10	5.01668	2.11996
	YGR157W	8.53383	4.92307	2.11957
	YMR173W-A	10.2811	7.20086	2.11957
	YLL028W	10.8	5.66771	2.11944
	YBR065C	8.44829	4.96142	2.11932
	YMR102C	10.1099	7.28869	2.11917
	YMR023C	9.81028	5.61401	2.11909
	YGR041W	8.3545	6.7	2.11905
	YBL058W	8.95101	4.98101	2.1189
	YDR470C	9.88841	8.08045	2.1189
	YNR032C-A	10.8581	5.42169	2.11886
	YKL038W	9.80808	6.04505	2.11875
	YIL059C	9.8801	5.07814	2.11875
	YDR386W	10.3101	6.22745	2.11869
	YLL053C	8.88488	5.58183	2.11866
	YDR502C	10.3333	5.74696	2.11861
	YJR151C	9.34853	4.81515	2.11859
	YJL105W	8.825	5.12527	2.11854
	YBL046W	8.95101	4.78838	2.11834
	YGR134W	10.9259	6.17075	2.11828
	YGL139W	8.98585	5.93455	2.11818
	YGL221C	10.8089	7.10309	2.11782
	YJL208C	10.0893	7.62635	2.11771
	YKL129C	9.10544	5.6	2.11736
	YML079W	9.02885	6.35685	2.11736
	YOR186W	8.28106	5.27847	2.11733
	YHR153C	10.4839	6.40953	2.11727
	YPL167C	10.3489	5.44919	2.11723
	YOL038c-A	10.8959	5.39129	2.11717
	YHR126C	10.8884	6.19083	2.11696
	YOL086w-A	10.4091	5.48961	2.11691
	YER109C	8.10103	5.02142	2.11668
	YBR058c-A	8.51051	6.16794	2.11667
	YHR155W	10.8889	6.34184	2.11667
	YLR307c-A	10.8931	5.77308	2.11667
	YKR088C	9.89899	6.53406	2.11667
	YLR389C	10.2988	5.07862	2.1165
	YGL009C	10.4328	7.59771	2.11649
	YBR074W	10.8291	5.07606	2.11646
	YPR045C	10.3333	5.3802	2.11616
	YLR059C	9.04505	5.41205	2.11599
	YGR151C	10.5294	7.47993	2.11596
	YJL049W	10.3099	5.83419	2.11575
	YML062C	9.45833	6.56306	2.11555
	YGR022C	10.981	5.78602	2.11553
	YOL100W	10.8911	6.49154	2.1155
	YJR050W	10.8481	6.32037	2.11544
	YMR209C	10.0528	5.34659	2.1152
	YPL001W	8.35833	6.0871	2.11491
	YJL057C	10.8848	5.76264	2.11462
	YGL196W	10.1011	6.73039	2.11454
	YBR033W	8.41089	4.8734	2.11451
	YGR254W	10.8358	5.48036	2.11432
	YOR280C	10.8933	4.92069	2.11402
	YPL017C	10.8883	6.20865	2.114
	YNL086W	10.8341	5.97096	2.11383
	YGL134w	10.8095	5.79503	2.11381
	YER096W	10	6.63012	2.11378
	YNL201C	10.9858	5.41573	2.11358
	YHR203C	10.8341	5.2978	2.11329
	YGL138C	8.24803	6.8463	2.11325
	YGL085W	10.8105	6.41448	2.11314
	YOR345C	9.88889	5.08708	2.11311
	YOR311C	9.44109	5.61684	2.11286
	YOR185C	8.1095	5.96833	2.11276
	YHR138C	10.3929	5.09721	2.11238
	YER010C	8.39855	6.33687	2.11223
	YIL170W	8.85039	3.28357	2.11216
	YBL104C	10.8582	6.02659	2.11195
	YMR173W	10.8854	6.39561	2.1119
	YMR119W-A	10.2806	5.92419	2.11182
	YOR165W	10.1088	5.86074	2.1118
	YOR374W	10.1082	5.60015	2.11175
	YJL144W	8.1081	7.44669	2.11172
	YKL116C	10.108	6.08648	2.11158
	YBR157C	10.8829	5.52605	2.11151
	YKL031W	8.88106	6.10764	2.11121
	YIL165C	8.43333	5.05321	2.11108
	YBL078C	9.89109	4.90808	2.11106
	YBL032W	8.48011	6.15498	2.11099
	YJL139C	10.0405	6.95379	2.11094
	YBL042C	10.35	5.71631	2.11087
	YLR380W	9.88285	4.87823	2.11085
	YNL325C	10.1092	8.09607	2.11071
	YLR093C	8.88598	6.12966	2.11051
	YBR040W	8.99109	4.68246	2.11037
	YPL192C	10.1094	4.38418	2.11037
	YOR087W	10.5108	5.20025	2.11035
	YBR272C	10.0549	5.31636	2.11034
	YPR021C	10.8384	5.26229	2.11034
	YER093C-A	10.8586	6.54419	2.11033
	YPL201C	10.491	4.71129	2.11025
	YPL036W	9.88885	5.88129	2.11012
	YOR246C	10.811	5.44335	2.11009
	YGR169C	8.88106	6.09215	2.11009
	YBR014C	8.48411	4.65116	2.10997
	YNL283C	9.10104	5.05381	2.10985
	YGR086C	10.8983	3.23016	2.10977
	YPL030W	8.10286	5.94846	2.10966
	YOL039W	8.08384	5.39868	2.10954
	YFL003C	10.1089	5.57804	2.10948
	YHL032C	10.4109	6.67354	2.10944
	YLL042C	9.49511	5.42952	2.1094
	YCR102C	10.1095	5.85949	2.1093
	YJR058C	10.1028	5.57902	2.10921
	YMR182C	10.0104	6.07119	2.10916
	YLL057C	8.8389	5.73519	2.10912
	YKL161C	8.93548	5.16942	2.10862
	YHL010C	10.8	6.79647	2.1086
	YMR052W	9.4381	5.35089	2.10846
	YDR436W	9.80388	5.13001	2.10838
	YIL117C	8.48108	5.05239	2.10834
	YOR213C	10.3848	5.38804	2.10825
	YPL241C	10.4109	5.40004	2.10807
	YIL114C	8.981	4.91182	2.10799
	YAL037W	8.38333	7.70445	2.10776
	YGR084C	10.8844	4.72	2.10761
	YHR182W	10.3108	6.49699	2.10753
	YOR047C	10.8406	6.02711	2.10738
	YPR108w-A	9.48088	5.26401	2.10718
	YLR044C	10.3388	5.61716	2.10668
	YCR034W	2.01004	4.66759	2.10662
	YCR037C	9.81043	5.83553	2.10659
	YKR031C	8.50889	3.69296	2.1065
	YNL219C	10.4109	4.86895	2.10638
	YBL039C	10.1046	3.67033	2.10599
	YKL218C	8.0083	5.51326	2.10588
	YFL010C	10.51	5.20547	2.10587
	YOR147W	10.1	4.77648	2.10585
	YFR032C	10.883	5.93183	2.10563
	YPR173C	10.8031	4.71078	2.10548
	YOR094W	10.9489	4.74193	2.10544
	YNL014W	10.4858	6.00032	2.10524
	YOR009W	10.2432	4.73958	2.10508
	YOR284W	10.5	4.63373	2.10484
	YPR011C	10.9888	5.14696	2.10479
	YPR028W	10.5431	6.84523	2.10476
	YKL096c-B	10.1005	6.53315	2.10438
	YOL014W	9.82886	5.96478	2.10437
	YOR226C	10.1011	5.64555	2.10432
	YNL252C	10.3804	6.3413	2.10428
	YNR024W	10.939	5.88264	2.10424
	YDR508C	9.10348	7.06218	2.1042
	YJL079C	10.9494	5.76598	2.10417
	YIL001W	8.108	7.50644	2.10398
	YHR039C	10.8439	5.76973	2.10396
	YGR001C	10.8429	6.75521	2.10386
	YPL248C	10.3108	5.43259	2.10375
	YLR386W	10.5833	5.09221	2.10365
	YKL017C	8.90104	5.57019	2.10359
	YKL079W	8.89825	4.99997	2.10357
	YOR229W	10.0541	5.65041	2.10357
	YDL036C	10.4105	5.19975	2.10355
	YBL011W	10.0989	3.15231	2.10292
	YKR093W	10.8084	6.12136	2.10291
	YLR242C	10.2933	2.55294	2.10287
	YNR030W	10.1089	5.30411	2.10281
	YMR069W	10.0101	7.27969	2.10273
	YNL231C	10.811	5.02167	2.10233
	YOR137C	8.10399	5.43389	2.1023
	YDL036C	7.4581	3.95283	2.102
	YAL039C	10.4109	6.16901	2.10188
	YHL045W	10.81	7.29398	2.10181
	YMR262W	8.55102	6.39574	2.10178
	YIL089W	9.58841	4.97994	2.10168
	YML059C	9.29	5.70996	2.10139
	YPL206C	10.1081	5.13375	2.10125
	YOR293W	10.4444	3.65294	2.10117
	YMR174c	8.8	6.79995	2.10112
	YOL107W	10.1025	6.41238	2.10109
	YOR316c-A	10.0855	5.29211	2.10109
	YDL034W	8.88101	6.06489	2.10106
	YLR124W	9.25926	5.06305	2.10092
	YNL286W	8.88804	6.25547	2.10083
	YGL263W	10.1029	6.88923	2.10082
	YDR399W	10.0099	6.36167	2.10081
	YBR229C	10.8834	7.89489	2.10079
	YOL160W	10.2883	5.92982	2.10074
	YML080W	9.10385	5.99941	2.10074
	YGR070W	10.9481	5.75417	2.10073
	YBL044W	8.98101	6.43944	2.10068
	YGR096W	9.58831	6.16534	2.10064
	YMR013w-A	10.0103	5.22804	2.10062
	YIL120W	8.41029	4.73098	2.10062
	YOR338W	10.0929	6.29358	2.10049
	YOR377W	8.08284	4.29505	2.10048
	YIL056W	8.38889	5.17626	2.10046
	YPR066W	10.5986	5.65151	2.1004
	YOR215C	10.8101	5.47221	2.10025
	YGR109C	9.81006	6.85065	2.10016
	YPL224C	10.1088	6.17518	2.10008
	YGL006W	10.5286	5.80987	2.10005
	YPL096c-A	4.88041	3.72937	2.10002
	YIR009W	9.03804	4.72265	2.1
	YLL013C	10.8585	4.3342	2.1
	YPR089W	8.35398	6.76087	2.09981
	YKL191W	8.10828	5.20065	2.09961
	YJL051W	10.8	6.31134	2.09958
	YJL016W	9.25253	5.07527	2.09957
	YJL136w-A	10.101	5.42678	2.09941
	YKL046C	9.10981	6.67811	2.0993
	YOR300W	10.2933	3.66324	2.09921
	YOR351C	9.81088	6.4731	2.09883
	YER186C	10.1085	5.29068	2.09824
	YOL119C	10.8848	4.72978	2.09821
	YLR228C	9.41005	4.65409	2.09815
	YHR077C	10.3333	5.54163	2.09814
	YCR090C	10.4429	5.41991	2.09788
	YNL059C	10.8	3.38861	2.09765
	YOR298C-A	10.1084	5.81574	2.09755
	YBL083C	10.801	3.32492	2.09753
	YBR072W	9.92929	3.90368	2.09749
	YLR001C	9.98939	6.17706	2.09743
	YLR104W	8.38511	6.36679	2.09725
	YLR341W	10.8891	5.05004	2.09709
	YOR228C	10.1099	4.60026	2.09701
	YKL163W	9.33981	5.97418	2.09693
	YBR074W	9.9899	4.60926	2.09684
	YGL121C	8.80102	6.14837	2.09667
	YML011C	8.9	6.72249	2.09651
	YPL046C	8.30556	6.18728	2.09647
	YOR161C	10.8839	6.17658	2.09634
	YMR320W	10.1081	5.93323	2.09631
	YNL254C	10.4089	7.67647	2.09621
	YBR076W	9.10581	4.45137	2.09613
	YDR346C	10.8441	6.62693	2.09607
	YMR242w-A	8.10889	5.55031	2.09604
	YLR311C	8.93101	4.8891	2.09604
	YNL078W	8.58944	6.66844	2.09582
	YML054C	8.85849	5.77564	2.09579
	YGL066W	10.9858	9.16768	2.09567
	YGR022C	10.8285	6.22354	2.09565
	YPR078C	8.58333	5.37425	2.09563
	YOR059C	10.8103	5.30575	2.09562
	YJR112W-A	10.954	4.47092	2.09557
	YOR108W	8.10286	2.21823	2.09543
	YNL173C	10.8901	6.44939	2.09538
	YOR225W	10.1011	5.57788	2.09526
	YKR087C	10.3109	6.06306	2.09524
	YOR039W	10.9439	4.13091	2.09524
	YNL187W	10.3089	6.06178	2.09487
	YJL073W	10.4531	4.68664	2.0948
	YMR184W	10.9043	6.04805	2.09452
	YJR005W	10.5395	7.36066	2.0944
	YNL117W	9.88101	5.63476	2.09437
	YGR067C	8.88089	6.77554	2.09426
	YOR162C	9.00926	6.52666	2.09423
	YLR434C	10.9881	7.37839	2.09385
	YMR219W	8.81045	6.62693	2.09383
	YMR118C	8.88488	5.32495	2.09368
	YJL160C	10.1093	4.46733	2.09353
	YOR384W	9.10101	5.00437	2.09345
	YPL031C	10.8891	3.49264	2.09342
	YJL116C	10.5909	5.30243	2.09323
	YJR048W	10.1029	4.62333	2.09283
	YLR364W	10.4839	5.0274	2.09267
	YJL101C	8.58485	5.25866	2.09262
	YIL130W	8.89082	5.10205	2.09255
	YJL030W	10.1088	5.12753	2.09236
	YLR047C	9.88105	5.14801	2.09235
	YOL032W	8.84103	5.4258	2.09227
	YIL067C	8.08891	6.13165	2.0922
	YGR031W	9.28105	6.59739	2.09202
	YHR076W	10.2481	5.5643	2.09179
	YDR347W	10.5489	5.27241	2.09168
	YHR159W	10.451	6.34715	2.09163
	YMR163C	10.9891	6.80398	2.09158
	YAL046C	8.28106	7.49725	2.0915
	YLR121C	8.88844	4.53355	2.09138
	YLR361c-A	10.9888	5.50036	2.0912
	YDR497C	10	6.76152	2.09058
	YMR175w-A	10.2853	5.38889	2.09056
	YPL038W	8.8285	6.09128	2.09051
	YPL274W	10.5881	5.81617	2.0905
	YJL100W	10.8889	6.09337	2.09047
	YNR068C	10.4839	5.25039	2.09046
	YBL012C	10.511	4.8979	2.09045
	YNL053W	10.0885	6.41429	2.09034
	YGR139W	10.1029	6.94258	2.0903
	YFL011W	10.3289	5.93781	2.09025
	YGR063C	10.4109	2.57803	2.09012
	YMR279C	10.4885	5.94904	2.09001
	YNL097c-A	10.9084	5.20027	2.08982
	YGR039W	9.9881	6.91225	2.08976
	YGL125W	8.81089	4.89922	2.08972
	YBL028C	9.10581	5.17239	2.08971
	YML109W	10.8839	6.58327	2.08969
	YJL214W	8.85101	7.32641	2.08944
	YOL131W	10.8889	4.98975	2.08942
	YOR155C	9.10103	5.61006	2.08932
	YJR147W	10.8451	4.86175	2.0892
	YFR043C	10.1025	5.77775	2.08912
	YKL011C	9.38834	5.87652	2.08912
	YPL054W	9.83896	6.48992	2.08901
	YMR182w-A	10.8892	4.85742	2.089
	YIL136W	8.30329	4.24934	2.08889
	YBR050C	8.81004	5.12847	2.08865
	YPL067C	9.4385	5.21473	2.08841
	YER099c	9.531	5.7243	2.08836
	YLR334C	10.8333	6.54528	2.08826
	YNR067C	9.4581	5.16837	2.08811
	YOR293c-A	8.10858	5.28241	2.08807
	YHR005C	10.0989	4.20521	2.08777
	YOR043W	10.9494	8.96	2.08776
	YLR013W	8.83488	5.47771	2.08757
	YOL057W	9.55108	6.27386	2.08704
	YGL104C	8.44088	6.75064	2.08698
	YLR263W	8.35508	5.79536	2.08693
	YKL084W	8.83011	5.44318	2.08682
	YLR319C	8.38885	6.85254	2.0867
	YOR008C-A	10.4108	2.60484	2.08668
	YER120W	10.0104	5.71264	2.08651
	YDR424C	10.3243	7.04344	2.08647
	YMR319C	10.8988	6.3068	2.08616
	YER089C	10.8941	5.57313	2.0861
	YHL020C	10.9084	4.65696	2.08598
	YGL054C	10.3902	8.44214	2.08585
	YJR054W	10.9585	3.8608	2.08566
	YBR067C	9.10094	4.11854	2.08546
	YOR001W	10.0981	3.73003	2.08546
	YJL212C	9.08036	7.74559	2.08542
	YER175w-A	10.2959	4.54656	2.08539
	YMR158C-B	9.89903	5.95164	2.08537
	YLR312C	8.38101	6.04407	2.08521
	YLL019C	8.81089	4.34959	2.08512
	YML038C	10.8041	6.45346	2.085
	YHR086W	10.3381	6.24116	2.08498
	YGL033W	10.9595	4.34351	2.08497
	YOR041C	10.0103	5.98462	2.0846
	YKL211C	8.8101	4.43236	2.08449
	YDR484W	X	3.13902	2.0844
	YJR030C	10.3385	5.24018	2.08438
	YFL004W	10.011	5.44098	2.08437
	YDR387C	10.5988	6.78528	2.08421
	YJL062W	10.8389	4.49851	2.08416
	YOR205C hom dip	10.5835	5.29018	2.08413
	YMR136W	10.4839	6.73601	2.08405
	YGL192w	9.04288	5.23373	2.08401
	YNL266W	10.3889	7.88919	2.08382
	YGR159C	10.8581	4.63264	2.08359
	YKL185W	8.29411	5.2305	2.08357
	YKL217W	8.08589	4.61796	2.08341
	YOR003W	10.5885	4.74485	2.08318
	YGR141W	9.0091	6.61702	2.08302
	YGR146C	8.51081	7.19122	2.08301
	YPL060W	8.88889	5.19582	2.083
	YNL217W	10.1088	6.23639	2.08293
	YLR312c-B	10.1089	5.95164	2.08261
	YGR260W	10.8558	5.77027	2.08255
	YJL071W	10.0989	5.42401	2.08229
	YOR085W	10.241	4.89442	2.08187
	YDR538W	10	5.31482	2.08169
	YHR049C-A	10.9508	4.38959	2.08166
	YOR188W	8.1029	5.19119	2.08119
	YHR035W	10.8889	6.6178	2.08107
	YNL134C	10.801	5.78949	2.08084
	YPL056C	8.50835	6.51697	2.08066
	YOR006C	10.8853	4.69142	2.08066
	YDR425W	10.1049	4.83916	2.08053
	YJL103C	10.8833	5.69728	2.08049
	YOL085C	9.10881	5.6249	2.08048
	YBR073W	9.81088	4.21962	2.08046
	YPL057C	8.381	7.64825	2.08034
	YIL039W	8.88826	6.17692	2.08024
	YOR321W	10.0829	6.08034	2.08023
	YLR068W	10.9484	4.23864	2.08015
	YER028C	8.89911	5.46339	2.07998
	YKL015W	9.94891	6.42827	2.07957
	YER007w	8.93911	5.59396	2.07951
	YGR205W	8.98101	6.4612	2.07947
	YIL161W	8.85089	4.7041	2.07942
	YER105c	9.08285	5.47489	2.07932
	YJL198W	9.81005	9.39286	2.07931
	YGR053C	10.58	5.06933	2.07931
	YML042W	10.4894	6.0168	2.07926
	YHR160C	10.8556	6.06178	2.07926
	YGL021W	10.0329	7.78212	2.0791
	YLR395C	10.8109	5.66628	2.07906
	YLR016C	9.10589	6.17684	2.07895
	YNR062C	10.0556	6.29755	2.07892
	YKR064W	9.55	6.23699	2.07883
	YOR239W	10.5824	5.55479	2.07873
	YPL048W	8.41009	6.50438	2.07873
	YGR124W	10.5904	6.02115	2.07861
	YNL200C	10.9049	5.72959	2.07828
	YHR202W	10.109	6.49484	2.07814
	YBR013C	8.38481	4.75402	2.07783
	YJR125C	10.0109	9.68819	2.07778
	YOR097C	8.42848	5.63443	2.07778
	YBL031W	9.89389	4.65232	2.07772
	YJL218W	9.28804	7.07498	2.07732
	YNL194C	10.4288	5.40234	2.07731
	YLR037C	10.4105	5.45842	2.0771
	YPL162C	10.984	6.11023	2.07709
	YBR062C	9.33854	5.12112	2.07705
	YBR030w	8.84545	5.52031	2.07701
	YCR048W	9.49485	5.24348	2.07687
	YOR276W	10.5541	5.92961	2.07672
	YKL010C	8.82983	6.02658	2.07655
	YPL165C	8.92453	5.47051	2.07653
	YPL263C	10.5101	5.54409	2.07647
	YAR040C	8.10885	7.50335	2.0763
	YJL216C	8.99108	7.13301	2.07628
	YKL148C	8.828	4.77308	2.0762
	YDR428C	10.1094	7.20619	2.0761
	YNR055C	8.09396	4.81132	2.076
	YBL082C	8.81089	3.52547	2.07581
	YIL042C	8.49589	4.87857	2.07574
	YLR042C	10.5	4.62836	2.07565
	YJR053W	10.4349	5.79781	2.07538
	YJR078W	8.10394	1.98822	2.07529
	YHL019C	10.0941	6.08162	2.07528
	YGR100W	10.4511	5.05462	2.07522
	YHR049W	10.301	5.17855	2.07516
	YOR346W	9.4488	5.92913	2.07514
	YMR056C	9.88889	5.71617	2.07505
	YLR348C	10.8889	5.57387	2.0748
	YPR159c-A	9.08101	5.28736	2.07476
	YDR370C	10.8388	6.83103	2.07475
	YCR065W	10.9891	4.87807	2.07465
	YOR378W	8.33333	5.33626	2.07465
	YNL334C	10.2838	7.55987	2.07463
	YJL037W	10.3888	5.72527	2.07462
	YGR252W	10.8109	4.62126	2.07444
	YKL074C	9.95804	5.52665	2.07427
	YHR176W	10.8286	6.53262	2.07419
	YGR111W	8.38108	5.78846	2.07402
	YOR025W	10.81	5.68748	2.07397
	YIL168W	8.28811	5.14776	2.07388
	YMR175W	10.3443	6.34382	2.07348
	YBR059C	8.88388	4.26382	2.07341
	YDR506C	9.45098	5.20597	2.07325
	YOR053W	9.9899	4.7252	2.07297
	YDR326C	10.5489	6.33423	2.07292
	YPL134C	10.85	5.3476	2.07292
	YOL080C	9.51048	5.36445	2.07266
	YMR100W	10.8311	5.53868	2.07265
	YIL113W	8.981	4.85221	2.07263
	YGL213C	10.5108	5.42612	2.07262
	YGL257C	10.2811	6.32007	2.07245
	YGR078C	9.24881	5.13467	2.07244
	YPL037C	8.29809	5.7382	2.07244
	YGL118C	10.1085	6.95841	2.07243
	YGR295C	10.3253	5.51787	2.07223
	YCR031C	9.8	4.97977	2.07204
	YOL051W	9.8881	5.68674	2.07199
	YGR133W	8.88083	6.81559	2.07164
	YJL185C	9.8101	8.85928	2.07157
	YOR147W	10.2528	5.92774	2.07155
	YOR114W	8.88986	5.69925	2.07106
	YKL138C	10.8581	5.83899	2.07097
	YLL052C	8.98298	5.8445	2.07087
	YBR271W	10.1035	5.75899	2.07083
	YOR100C	8.2895	5.23945	2.07081
	YCR066W	10.8911	5.62682	2.07071
	YBL068W	8.1058	6.41376	2.07067
	YKR044W	6.94203	6.54234	2.07045
	YDR515W	10.3581	5.4071	2.06991
	YJL106W	10.0959	5.6628	2.06973
	YLR406c-A	10.8556	5.18336	2.06957
	YBR125C	8.81081	5.45647	2.06957
	YHR167W	10.3443	7.27377	2.06953
	YMR081C	10.9508	6.82483	2.06949
	YGR213C	10.4101	6.73391	2.06949
	YBR056w-A	8.88826	5.32857	2.06941
	YPR001W	8.88889	6.16332	2.06926
	YGR043C	9.88889	6.56254	2.06923
	YJR153W	10.3911	5.0356	2.0692
	YGL191w	10.1084	5.76178	2.06912
	YPL269W	10.8889	5.09554	2.06907
	YHR184W	9.48511	6.33847	2.06907
	YLR346C	10.9508	6.48538	2.069
	YMR074C	8.48381	5.9541	2.0685
	YGL131C	10.1008	6.50514	2.0684
	YMR180C	10.1084	6.41856	2.06833
	YGR026W	9.10899	5.37731	2.06819
	YOL048C	9.25	6.1087	2.06816
	YLR363w-A	10.5825	4.77908	2.06805
	YOL058W	9.58948	6.10485	2.06805
	YPL207W	10.5	5.29776	2.06796
	YBL051C	8.10931	5.09829	2.06795
	YPL141C	10.8941	6.1578	2.06795
	YOR050C	10.5591	5.52279	2.06789
	YBR036C	8.9831	4.42127	2.06786
	YOR298W	10.8483	5.42489	2.0677
	YGR138C	10.1005	6.98051	2.06769
	YLR368W	10.4433	5.14231	2.06767
	YMR181C	10.984	6.59073	2.06764
	YLR036C	10.2405	5.85236	2.06755
	YMR244W	8.83108	7.10128	2.06741
	YOR131C	8.41011	5.28254	2.06735
	YOR034C	10.2803	5.30682	2.06724
	YLR343W	10.8411	5.85666	2.06699
	YHR200W	10.2424	5.72639	2.06693
	YJL058C	10.8038	6.22438	2.06667
	YBR006W	8.85849	3.88697	2.06658
	YOR072W	10.8103	5.32567	2.06658
	YPR117W	10.5881	4.35817	2.06657
	YJL112W	10.8109	5.81696	2.06655
	YKL105C	9.10455	5.64453	2.06641
	YKL109W	9.88889	5.56368	2.06637
	YKL026C	8.53098	5.81103	2.06627
	YOR070C	10.4848	4.81012	2.06623
	YLR432W	10.0101	5.77232	2.06593
	YIR016W	8.50311	4.2372	2.06576
	YLR098C	8.58103	6.36537	2.06571
	YOR076C	10.1099	4.4865	2.0657
	YKL147C	8.889	5.35589	2.06567
	YGL101W	8.48411	5.55194	2.06561
	YLR394W	10.0109	5.63062	2.06555
	YER067W	8.85109	6.81333	2.06546
	YGR122C-A	10.8104	5.02988	2.06542
	YOL037C	10.982	5.70125	2.06528
	YGR033C	8.81089	6.91945	2.06513
	YMR075C-A	10.5811	6.28003	2.06508
	YLR388W	10.0583	5.34482	2.06467
	YOL019w-A	10.8591	5.52374	2.06419
	YKL206C	8.10805	5.51371	2.06399
	YHR012W	10.1033	2.7543	2.06373
	YIL141W	8.10311	5.26326	2.0636
	YKL051W	8.10931	5.63334	2.06352
	YDR438W	10.081	6.52494	2.06348
	YAR042W	8.88588	8.56992	2.06341
	YLR004C	8.91089	6.28532	2.06313
	YBL107C	8.55283	5.09205	2.06311
	YDR467C	10.589	8.16082	2.06305
	YOR307C	10.8104	5.10596	2.063
	YOR288C	10.8849	4.13729	2.06297
	YPR050C	8.82803	7.03825	2.06292
	YKL197C	8.101	5.4056	2.06245
	YOR066W	10.84	5.65244	2.06224
	YLR023C	8.09838	5.49616	2.06217
	YIL140W	8.10581	5.10916	2.06214
	YKR040C	10.8848	5.07978	2.06212
	YBR003W	10.8081	5.02369	2.06192
	YKR100C	8.83831	4.97459	2.06181
	YOR113W	9.50488	5.01211	2.06148
	YGR256W	10.5829	5.84787	2.0614
	YOL121C	10.3848	5.84256	2.06132
	YGL177W	8.85108	5.85272	2.06098
	YMR261C	8.88899	6.22276	2.06089
	YMR234W	8.08859	6.98475	2.06079
	YPR059C	10.4301	4.09387	2.06078
	YGR049W	10.3049	7.227	2.06064
	YPL116W	10.106	5.63423	2.06027
	YAL011W	9.84486	5.10162	2.06024
[truncated: 3,090 more rows]
